# Supplementary material for: Estimation of the prevalence of depression using diagnostic instruments in the elderly population in India, 2000–2019: a systematic review protocol
Source: PubMed Central journal article supplement — BMJ Open. 2020 May 7;10(5):e034330. doi: 10.1136/bmjopen-2019-034330 (PMC7228514; doi:10.1136/bmjopen-2019-034330), 2020-05-07
Supplement: bmjopen-2019-034330.draft_revisions.pdf [file bmjopen-2019-034330.draft_revisions.pdf]

# BMJ Open

BMJ Open is committed to open peer review. As part of this commitment we make the peer review history of every article we publish publicly available.

When an article is published we post the peer reviewers' comments and the authors' responses online. We also post the versions of the paper that were used during peer review. These are the versions that the peer review comments apply to.

The versions of the paper that follow are the versions that were submitted during the peer review process. They are not the versions of record or the final published versions. They should not be cited or distributed as the published version of this manuscript.

BMJ Open is an open access journal and the full, final, typeset and author-corrected version of record of the manuscript is available on our site with no access controls, subscription charges or pay-per-view fees (<http://bmjopen.bmj.com>).

If you have any questions on BMJ Open's open peer review process please email [info.bmjopen@bmj.com](mailto:info.bmjopen@bmj.com)

# BMJ Open

## A systematic review protocol for estimation of the prevalence of depression using diagnostic instruments in the elderly population in India, 2000-2019

|                               |                                                                                                                                                                                                                                                                                                                                                                                                                                                                                                                                                                                               |
|-------------------------------|-----------------------------------------------------------------------------------------------------------------------------------------------------------------------------------------------------------------------------------------------------------------------------------------------------------------------------------------------------------------------------------------------------------------------------------------------------------------------------------------------------------------------------------------------------------------------------------------------|
| Journal:                      | <i>BMJ Open</i>                                                                                                                                                                                                                                                                                                                                                                                                                                                                                                                                                                               |
| Manuscript ID                 | bmjopen-2019-034330                                                                                                                                                                                                                                                                                                                                                                                                                                                                                                                                                                           |
| Article Type:                 | Protocol                                                                                                                                                                                                                                                                                                                                                                                                                                                                                                                                                                                      |
| Date Submitted by the Author: | 24-Sep-2019                                                                                                                                                                                                                                                                                                                                                                                                                                                                                                                                                                                   |
| Complete List of Authors:     | Behera, Priyamadhaba; AIIMS, Raebareli, Department of Community and Family Medicine<br>Pilania, Manju; RUHS College of Medical Sciences, Department of Community Medicine<br>Yadav, Vikas; Atal Bihari Vajpayee Government Medical College, Department of Community Medicine<br>Bairwa, Mohan; IIHMR University, Jaipur, Public Health & Epidemiology<br>Dabar, Deepti; AIIMS Bhopal<br>Behera, Surama; Regional Medical Research Centre Bhubaneswar<br>Poongothai, S.; Madras Diabetes Research Foundation<br>Mohan, V; Madras Diabetes Research Foundation<br>Gupta, Shiv; IIHMR University |
| Keywords:                     | Prevalence, Elderly, India, Depression, Diagnostic tool                                                                                                                                                                                                                                                                                                                                                                                                                                                                                                                                       |
|                               |                                                                                                                                                                                                                                                                                                                                                                                                                                                                                                                                                                                               |

SCHOLARONE™  
Manuscripts

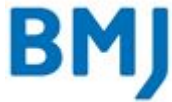

I, the Submitting Author has the right to grant and does grant on behalf of all authors of the Work (as defined in the below author licence), an exclusive licence and/or a non-exclusive licence for contributions from authors who are: i) UK Crown employees; ii) where BMJ has agreed a CC-BY licence shall apply, and/or iii) in accordance with the terms applicable for US Federal Government officers or employees acting as part of their official duties; on a worldwide, perpetual, irrevocable, royalty-free basis to BMJ Publishing Group Ltd ("BMJ") its licensees and where the relevant Journal is co-owned by BMJ to the co-owners of the Journal, to publish the Work in this journal and any other BMJ products and to exploit all rights, as set out in our [licence](#).

The Submitting Author accepts and understands that any supply made under these terms is made by BMJ to the Submitting Author unless you are acting as an employee on behalf of your employer or a postgraduate student of an affiliated institution which is paying any applicable article publishing charge ("APC") for Open Access articles. Where the Submitting Author wishes to make the Work available on an Open Access basis (and intends to pay the relevant APC), the terms of reuse of such Open Access shall be governed by a Creative Commons licence – details of these licences and which [Creative Commons](#) licence will apply to this Work are set out in our licence referred to above.

Other than as permitted in any relevant BMJ Author's Self Archiving Policies, I confirm this Work has not been accepted for publication elsewhere, is not being considered for publication elsewhere and does not duplicate material already published. I confirm all authors consent to publication of this Work and authorise the granting of this licence.

1  
2  
3  
4 **A systematic review protocol for estimation of the prevalence of depression**  
5 **using diagnostic instruments in the elderly population in India, 2000-2019**  
6  
7

8  
9 **Authors**  
10

11  
12 <sup>1</sup>Priyamadhava Behera, MD, AIIMS, Raebareli, India

13 Email: [priya.madhaba@gmail.com](mailto:priya.madhaba@gmail.com)  
14

15  
16 <sup>2</sup>Manju Pilania, MD, RUHS College of Medical Sciences, Jaipur, India

17 Email: [drmanjupilania@gmail.com](mailto:drmanjupilania@gmail.com)  
18

19  
20 <sup>3</sup>Vikas Yadav, MD, Atal Bihari Vajpayee Government Medical College, Vidisha, India

21 Email: [drvikasyadav@gmail.com](mailto:drvikasyadav@gmail.com)  
22

23  
24 <sup>4</sup>Mohan Bairwa, MD, IIHMR University, Jaipur, India

25 Email: [drmohanbairwa@gmail.com](mailto:drmohanbairwa@gmail.com)  
26

27  
28 <sup>5</sup>Deepti Dabar, MD, AIIMS, Bhopal, India

29 Email ID: [deepti.dabar@gmail.com](mailto:deepti.dabar@gmail.com)  
30

31  
32 <sup>6</sup>Surama Manjari Behera, MPH (student), RMRC-ICMR, Bhubaneswar, India

33 Email: [surama.m92@gmail.com](mailto:surama.m92@gmail.com)  
34

35  
36 <sup>7</sup>S. Poongothai, PhD, Madras Diabetes Research Foundation, Chennai, India

37 Email: [poongothaisubramani@gmail.com](mailto:poongothaisubramani@gmail.com)  
38

39  
40 <sup>8</sup>Viswanathan Mohan, MD, PhD, Madras Diabetes Research Foundation, Chennai, India

41 Email: [drmohans@diabetes.ind.in](mailto:drmohans@diabetes.ind.in)  
42

43  
44 <sup>9</sup>Shiv Dutt Gupta, MD, PhD, IIHMR University, Jaipur, India

45 Email: [sdgupta@iihmr.edu.in](mailto:sdgupta@iihmr.edu.in)  
46

47  
48 **Short Title:** Estimation of depression prevalence in the elderly population in India  
49

50  
51 **Corresponding Author**

52 Dr. Mohan Bairwa, MD

53 IIHMR University,

54 1, Prabhu Dayal Marg, Near Sanganer Airport,

55 Jaipur, India – 302029

56 Email ID: [drmohanbairwa@gmail.com](mailto:drmohanbairwa@gmail.com)  
57  
58  
59  
60

## **Abstract**

**Introduction:** Depression is a common mental disorder in the elderly population which has a significant impact on their quality of life. However, the correct estimate is not available on the magnitude of depression among elderly persons in India. Therefore, we have planned this systematic review and meta-analysis to estimate the depression prevalence using diagnostic instruments in the elderly population.

**Methods and analysis:** Searches will be performed in PubMed, Scopus, Embase, Web of Science, CINAHL, and PsycINFO. Community-based cross-sectional and cohort studies (2001 – 9/2019) reported the depression prevalence using diagnostic instruments among the elderly population will be included. Studies conducted among chronic patients, in-hospital patients, and other special groups such as with disaster-stricken experiences and the studies reporting the only subcategory of depression will be excluded. Disagreements in study selection and data abstraction will be resolved by consensus and arbitration by a third reviewer. AXIS critical appraisal tool will be used for quality assessment of individual studies. Findings of eligible studies will be pooled using fixed-effects or random-effects meta-analysis whichever appropriate. Heterogeneity between studies will be examined Cochran's Q test and quantified using  $I^2$  statistic. The cumulative meta-analysis will be used to detect temporal trends in the depression prevalence and effect of poor-quality studies on the pooled estimate. Publication bias will be assessed by visual inspection of funnel plots and tested by egger test.

**Ethics and dissemination:** No ethical approval will be needed because it will be a systematic review. Data from previously published studies will be retrieved and analyzed. Findings will be disseminated through a peer-reviewed publication in a scientific journal and conferences.

**PROSPERO** registration number CRD42019138453.

**Keywords:** Prevalence, Depression, India, Elderly, Diagnostic tool, Systematic review

### **Strengths and limitations of this study**

- The first-ever systematic review of depression prevalence in India based on diagnostic instruments only.
- The heterogeneity in methodologies such as diagnostic criteria, study duration, sampling design, and study locations may limit comparison across studies.

- Meta-analytic techniques such as cumulative meta-analysis, leave-one-out (jack-knife estimation) meta-analysis, and meta-regression will enrich the analysis and provide the estimate of prevalence nearer to the population estimate.
- A comprehensive synthesis of all available depression prevalence data in India using a standardized risk of bias tool.
- The protocol adheres to Preferred Reporting Items for Systematic Reviews and Meta-Analyses Protocols guidelines.

**Word count:** 2186

For peer review only

## **A systematic review protocol for estimation of the prevalence of depression using diagnostic instruments in the elderly population in India, 2000-2019**

### **Introduction**

Mental disorders are chronic in nature and highly prevalent conditions which have a significant impact on the quality of life (1–3). Depression not only affects the quality of life but also increases the risk of all-cause mortality including cardiovascular diseases and stroke (4). The Global Burden of Disease study projected that depression will be the leading cause of Disability Adjusted Life Years by 2020 in developing countries (5). Depression is the most common mental disorder which affects 322 million global population with prevalence ranged 4-13% minor depression and 1-4% major depression (6–8). In the era of population aging, the share of elderly persons will be almost double from 12% to 22%, between 2015 and 2050. This figure is expected to reach 19% by 2050 compared to 8.6% (2011) in India (9,10). This will further worsen the mental health situation of elderly populations in India.

Depression is already both underdiagnosed and undertreated mental disorder in elderly persons and its varied presentation makes the diagnosis more difficult. Elderly persons with depression have poorer functioning compared to their age-matched counterparts without depression and also have increased the cost of health care (8,11). Despite the fact that population is aging rapidly and its share in India is likely to increase from 8.6% (2011) to 19% by 2050 (9,10), little is known about its magnitude at national and regional level. With this background, we attempted to estimate the prevalence of depression in elderly population in India using published studies employed screening tests to identify depression (12). The study provided higher estimate of the depression prevalence in elderly populations, the screening tests might have overestimated the prevalence given higher sensitivity of the screening test albeit low specificity. The screening tests blur the distinctions between low- and high-prevalence population due to false positives(13–15). Moreover, the prevalence studies vary in methodologies including variable sensitivity and specificity of screening of tests, geographical and cultural characteristics, and level of expertise among data collectors (16–18). The studies indicated that prevalence of depression should be estimated using reliable and validated diagnostic tools to identify depression more accurately and to help for planning and health systems management (12,14). A comprehensive clinical interview using a sensitive and specific

1  
2  
3  
4 diagnostic tool is the gold standard for confirming a diagnosis of depression and plan the  
5 appropriate therapy (19). Therefore, we planned this systematic review and meta-analysis to  
6 estimate the prevalence of depression including the studies used diagnostic instruments among  
7 elderly persons in India.  
8  
9  
10

## 11 **Methods**

12  
13  
14  
15 This systematic review protocol has been prepared in accordance with the Preferred Reporting  
16 Items for Systematic Reviews and Meta-analysis Protocol (PRISMA-P) (20), which provides  
17 a standardized guide for performing systematic reviews and meta-analysis (Appendix 1.  
18 PRISMA-P checklist). The protocol has been registered on PROSPERO  
19 (CRD42019138453)(21).  
20  
21  
22  
23  
24

### 25 **Eligibility criteria**

26  
27 Elderly population aged 60 years and above in India is the population of interest. This review  
28 will include the studies with the following eligibility criteria:  
29  
30

#### 31 *Inclusion criteria:*

- 32 1) Community-based cross-sectional and cohort studies published during 2001-9/2019
- 33 2) Studies reported the prevalence of depression/ depressive symptoms using diagnostic  
34 criteria/ instruments for identifying depression  
35  
36  
37  
38

#### 39 *Exclusion criteria*

- 40 1) Studies among chronic patients, in-hospital patients, and other special groups such as  
41 with disaster-stricken experiences;  
42  
43
- 44 2) Studies which reported subcategory of depression only  
45  
46  
47

### 48 **Information sources**

49 Searches will be performed in PubMed, Scopus, Embase, Web of Science, CINAHL, and  
50 PsycINFO. To enrich and supplement the literature search, the references of selected articles  
51 and relevant reviews will be scanned. Then, we will circulate a list of identified articles to the  
52 systematic review team, as well as to the selected experts working in this field to ensure the  
53 completeness of search results.  
54  
55  
56  
57  
58  
59  
60



## Search strategy

Initially, controlled descriptors (such as MeSH terms, CINAHL headings, PsycINFO thesaurus) will be identified in each database. Following keywords such as “psychiatric”, “depression”, “mental”, “depressive disorders”, “aged”, “geriatric”, “elderly”, “old aged”, “aging”, “prevalence”, “epidemiological studies”, “epidemiology”, and “India” will be used to develop the search strategy. Appropriate Boolean operators will be employed. We will not impose any language limit. The search will be limited to human subjects. Below the search strategy for PubMed is given:

#1. psychiatric OR depressi\* OR mental OR "Depression"[Mesh] OR "Depressive Disorder"[Mesh]

#2. "Aged"[Mesh] OR geriatric OR elder\* OR "old aged" OR aging

#3. "Prevalence"[Mesh] OR prevalence OR "Epidemiology"[Mesh] OR “epidemiological stud\*”

#4. India

#5. #1 AND #2 AND #3 AND #4

#6. Filters: Publication date from 2001/01/01, Humans.

## Selection process and data management

Two reviewers (MP and PMB) will conduct searches in all identified databases. All search results will be imported into Rayyan QCRI Software to ensure a systematic and comprehensive search and document the selection process (22). Another reviewer (VY) will manage the Rayyan and identify and remove the duplicate citations and ensure independent review of titles and abstracts by blinding the decisions of both reviewers. MP and PMB will review of titles and abstracts of the shortlisted citations in the Rayyan using a customized inclusion/exclusion checklist (population-based studies; depression prevalence, study duration, and India). Thereafter, VY will identify the discrepancies between the two reviewers in the Rayyan software and inform them for making consensus for the selection of the study. Full-text copies of all studies selected will be obtained to find more details. Both reviewers will review the full-text copies of articles to identify whether diagnostic instruments have been used to identify depression in the study participants.

We will record the reasons for the exclusion of all the studies for which we had obtained full copies. Wherever the studies have been reported in multiple publications/reports, all publications will be obtained. Whilst the study will be included as only one in the review and data will be extracted from all the publications to ensure maximal relevant data is obtained. The full-text copies of all selected articles will be evaluated for quality assessment and data extraction. The study selection process will be presented using PRISMA flow chart describing the reasons for the exclusion for the studies we will explore full texts.

The reference management software Mendeley Desktop for Windows will be used to store, organize, cite and manage all the selected references (23).

### **Data extraction**

PMB and MP will independently perform data extraction on key information including study details (author, year of publication); methods (study design, study location, study setting, sample size, sampling method, non-response, age, sex, screening procedure, screening for dementia, diagnostic instrument); and results (risk factors of depression studied and prevalence data) will be extracted. Any disagreement in the data abstraction will be resolved by consensus and if required, the arbitration will be done by the members of the review team (MB, VM, and SDG). First or corresponding authors will be contacted if additional information will be required in the selected articles.

### **Risk of bias in individual studies**

AXIS critical appraisal tool will be used for quality assessment of individual studies(24). The AXIS tool focuses mainly on the presented methods and results. The AXIS tool contains a 20-point questionnaire with “yes”, “no”, and “don’t know” answer that addresses study quality and reporting. The key areas in the AXIS tool included are study design, sample size justification, target population, sampling frame, sample selection, measurement validity and reliability, overall methods, and conflict of interest and ethical issues.

### **Strategy for data synthesis**

In this systematic review, extracted data will be presented in comprehensive tables and flowcharts. The pooling of prevalence will be done using meta-analysis, in case, the relevant information is not available for meta-analysis, narrative synthesis will be performed. The effect size of interest is the proportion of elderly people with depression. It will be presented

1  
2  
3  
4 using forest plot including individual prevalence, pooled estimates, and their 95% confidence  
5 intervals (CI). All pooled estimates will be calculated using appropriate model (fixed or  
6 random-effects model meta-analysis), based on the level of heterogeneity. Heterogeneity  
7 between studies will be examined using Cochran's Q test and quantified using  $I^2$  statistic. A  
8 rough estimate of the heterogeneity will be as follows:  $I^2$  0% to 40% - might not be  
9 important;  $I^2$  30% to 60% - may represent moderate heterogeneity;  $I^2$  50% to 90% - may  
10 represent substantial heterogeneity;  $I^2$  75% to 100% - considerable heterogeneity. The  
11 importance of the observed value of  $I^2$  will depend on (i) magnitude and direction of effects  
12 and (ii) strength of evidence for heterogeneity. Sensitivity and subgroup analyses will be used  
13 to identify the causes of heterogeneity. If required, meta-regression will be employed to  
14 determine the sources of heterogeneity (25).  
15  
16  
17  
18  
19  
20  
21  
22  
23

24 A cumulative meta-analysis will be done to detect temporal trends in the depression  
25 prevalence over the years and the effect of quality of studies. In the cumulative meta-analysis,  
26 studies are added one at a time in a specified order (e.g. according to date of publication or  
27 quality) and the results are summarised as each new study is added. In a graph of a cumulative  
28 meta-analysis each horizontal line represents the summary of the results as each study is  
29 added, rather than the results of a single study (26,27). All analysis will be done using updated  
30 versions of STATA(28) and R software (with meta and metafor packages) (29,30).  
31  
32  
33  
34  
35  
36

### 37 *Assessment of publication bias*

38  
39 Publication bias will be assessed by visual inspection of funnel plots and testing using Egger's  
40 weighted regression, with  $p < 0.1$  considered indicative of statistically significant publication  
41 bias (31).  
42  
43  
44  
45

### 46 *Sensitivity analysis*

47  
48 Sensitivity analysis (32) will be done to remove the influence of low-quality studies. We will  
49 also explore the effect of small studies (fewer than 100 participants), and studies not fulfilling  
50 age criteria fully such as participants aged 65 years or more. In particular, the Leave-One-Out  
51 method (also known as Jackknife estimation) in which we recalculate the results of our meta-  
52 analysis  $K-1$  times (where  $K$  is a total number of studies), each time leaving out one study.  
53 We will then compare the new pooled prevalence with that of the original pooled prevalence  
54 of depression. If the new pooled prevalence will lie outside of the 95% CI of the original  
55  
56  
57  
58  
59  
60

1  
2  
3  
4 pooled prevalence, we will conclude that the excluded study has a significant effect on the  
5 pooled estimate and should be excluded from the final analysis (33,34). Some other issues  
6 may also be identified for sensitivity analysis during the systematic review process.  
7  
8  
9

### 10 *Analysis of subgroups or subsets*

11  
12 In order to reduce the random variations between the estimates of the primary studies, we will  
13 perform subgroup analysis wherever feasible: study setting, geographical region (states),  
14 states by GDP per capita, type of diagnostic instrument, dementia screening, sampling design,  
15 and study period.  
16  
17  
18  
19

## 20 **Patient and Public Involvement**

21  
22  
23 No patients were directly involved in the design of this study. The data for this systematic  
24 review will be collected from previously published studies.  
25  
26  
27

## 28 **Discussion**

29  
30  
31 Screening tools are simple to administer, take less time and are highly useful in primary care  
32 settings to screen the people for depression (35). However, confirming a diagnosis of  
33 depression by a diagnostic tool provides the true picture of the magnitude of depression. The  
34 estimated prevalence of depression was significantly higher when self-reporting instruments or  
35 screening tools were used to assess the depression (12,18). The estimation based on screening  
36 tools varied widely with the type of study tools, geographic region, sample size, sampling  
37 methods, and prevalent socio-cultural differences in the country. These may be responsible for  
38 different levels of mental health disorders in India. Hence, we will address this issue by using  
39 different meta-analytic techniques such as subgroup and sensitivity analyses such as jackknife  
40 estimation, meta-regression, and cumulative meta-analyses.  
41  
42  
43  
44  
45  
46  
47  
48  
49

50 In India, National Mental Health Survey (NMHS) reported a lower prevalence of lifetime  
51 depression (3.14%) and during the previous 12-month period (1.7%) (36) compared to pooled  
52 data from 18 countries (n= 89,037) which estimated the average lifetime and 12-month  
53 prevalence estimates of DSM-IV MDE to be 14.6% and 5.5% in 10 high-income countries and  
54 11.1% and 5.9% in 8 low- to middle-income countries, respectively (37). This study will  
55 provide the unique opportunity to compare the magnitude of depression estimated using  
56  
57  
58  
59  
60

1  
2  
3  
4 screening tools and findings of NHMS with the pooled estimate of various research studies  
5 which have used diagnostic instruments for identification of depression among elderly persons  
6 in India.  
7  
8  
9

10  
11 In India, mental health services receive a minor fraction of the overall health budget, which is  
12 grossly inadequate in proportion to the rising burden of mental disorders. In addition, there is  
13 a lack of robust and reliable data to address the need for community based mental health  
14 services planning and management. The findings of this study, i.e., the estimated magnitude of  
15 depression among elderly persons using diagnostic instruments, distribution among subgroups,  
16 and regions will help to plan and manage geriatric mental health program in a better way and  
17 will provide further directions to future research in the depression epidemiology and its burden  
18 in the elderly population. It will also strengthen the provision of comprehensive mental health  
19 services, consequently, comprehensive primary health care among geriatric population in  
20 India, which is a pressing need for elderly populations given their rising share in the total  
21 population.  
22  
23  
24  
25  
26  
27  
28  
29  
30  
31

32 **Ethics and dissemination:** No ethical approval will be needed because it will be a systematic  
33 review. Data from previously published studies will be retrieved and analyzed. Findings will  
34 be disseminated through a peer-reviewed publication in a scientific journal and conferences.  
35  
36  
37

### 38 **Abbreviations**

39  
40  
41 GBD – Global Burden of Disease

42 GDP – Gross Domestic Product

43 NMHS – National Mental Health Survey  
44  
45  
46

### 47 **Supplementary data**

48  
49 Not applicable.  
50  
51

### 52 **Availability of data and materials**

53  
54 Will be available once collected.  
55  
56  
57  
58  
59  
60

### Author Contributions

Conceived the idea: PMB, MB, VY, MP, and SDG. Designed the protocol and wrote the paper: MB, VY, MP, PMB, DD, SMB, VM, SDG, and SP. Critical revision to the manuscript: MB, VY, MP, PMB, DD, SP, VM, and SDG. All authors have read and approved the manuscript. PMB and MB are the guarantors of the paper.

**Conflicts of Interest:** None declared.

**Funding:** This research received no specific grant from any funding agency in the public, commercial or not-for-profit sectors.

**Data sharing statement:** No additional data are available.

### Acknowledgments

None.

### References

1. Berlim MT, Fleck MPA. Quality of Life and Major Depression. In: Ritsner MS, Awad AG, editors. *Quality of Life Impairment in Schizophrenia, Mood and Anxiety Disorders: New Perspectives on Research and Treatment* [Internet]. Dordrecht: Springer Netherlands; 2007 [cited 2019 Sep 7]. p. 241–52. Available from: [https://doi.org/10.1007/978-1-4020-5779-3\\_12](https://doi.org/10.1007/978-1-4020-5779-3_12)
2. Sivertsen H, Bjørkløf GH, Engedal K, Selbæk G, Helvik A-S. Depression and quality of life in older persons: A review. *Dement Geriatr Cogn Disord*. 2015;40(5–6):311–39.
3. Monroe SM, Harkness KL. Is depression a chronic mental illness? *Psychol Med*. 2012 May;42(5):899–902.
4. Lépine J-P, Briley M. The increasing burden of depression. *Neuropsychiatr Dis Treat*. 2011;7(Suppl 1):3–7.
5. Murray CJ, Lopez AD. Alternative projections of mortality and disability by cause 1990-2020: Global Burden of Disease Study. *Lancet Lond Engl*. 1997 May 24;349(9064):1498–504.
6. Pilania M, Bairwa M, Kumar N, Khanna P, Kurana H. Elderly depression in India: An emerging public health challenge. *Australas Med J*. 2013 Mar 31;6(3):107–11.
7. *Depression and other common mental disorders: Global health estimates*. Geneva: World Health Organization; 2017. Report No.: WHO/MSD/MER/2017.2.

- 1
  - 2
  - 3
  - 4
  - 5
  - 6
  - 7
  - 8
  - 9
  - 10
  - 11
  - 12
  - 13
  - 14
  - 15
  - 16
  - 17
  - 18
  - 19
  - 20
  - 21
  - 22
  - 23
  - 24
  - 25
  - 26
  - 27
  - 28
  - 29
  - 30
  - 31
  - 32
  - 33
  - 34
  - 35
  - 36
  - 37
  - 38
  - 39
  - 40
  - 41
  - 42
  - 43
  - 44
  - 45
  - 46
  - 47
  - 48
  - 49
  - 50
  - 51
  - 52
  - 53
  - 54
  - 55
  - 56
  - 57
  - 58
  - 59
  - 60
8. World Health Organization. Mental health of older adults [Internet]. 2017 [cited 2019 Sep 9]. Available from: <https://www.who.int/news-room/fact-sheets/detail/mental-health-of-older-adults>
  9. Agarwal A, Lubet A, Mitgang E, Mohanty SK, Bloom DE. Population aging in India: Facts, issues, and options [Internet]. Program on the Global Demography of Aging; 2016 Oct [cited 2019 Sep 7]. (PGDA Working Papers). Report No.: 13216. Available from: <https://ideas.repec.org/p/gdm/wpaper/13216.html>
  10. Census of India Website : Office of the Registrar General & Census Commissioner, India [Internet]. [cited 2019 Sep 7]. Available from: <http://www.censusindia.gov.in/>
  11. Grover S, Dalla E, Mehra A, Chakrabarti S, Avasthi A. Physical comorbidity and its impact on symptom profile of depression among elderly patients attending psychiatry services of a tertiary care hospital. *Indian J Psychol Med.* 2017;39(4):450–6.
  12. Pilonis M, Yadav V, Bairwa M, Behera P, Gupta SD, Khurana H, et al. Prevalence of depression among the elderly (60 years and above) population in India, 1997–2016: a systematic review and meta-analysis. *BMC Public Health.* 2019 Jun 27;19(1):832.
  13. Thombs BD, Kwakkenbos L, Levis AW, Benedetti A. Addressing overestimation of the prevalence of depression based on self-report screening questionnaires. *CMAJ.* 2018 Jan 15;190(2):E44–9.
  14. Levis B, Yan XW, He C, Sun Y, Benedetti A, Thombs BD. Comparison of depression prevalence estimates in meta-analyses based on screening tools and rating scales versus diagnostic interviews: a meta-research review. *BMC Med.* 2019 Mar 21;17(1):65.
  15. Maxim LD, Niebo R, Utell MJ. Screening tests: a review with examples. *Inhal Toxicol.* 2014 Nov;26(13):811–28.
  16. Cheung MW-L, Ho RCM, Lim Y, Mak A. Conducting a meta-analysis: basics and good practices. *Int J Rheum Dis.* 2012;15(2):129–35.
  17. Boyle MH. Guidelines for evaluating prevalence studies. *Evid Based Ment Health.* 1998 May 1;1(2):37–9.
  18. Lim GY, Wilson W. Tam, Yanxia Lu, Ho CS, Melvyn W. Zhang, Ho RC. Prevalence of depression in the community from 30 countries between 1994 and 2014. *Sci Rep.* 2018;8(1):2861.
  19. Davison TE, McCabe MP, Mellor D. An examination of the “gold standard” diagnosis of major depression in aged-care settings. *Am J Geriatr Psychiatry Off J Am Assoc Geriatr Psychiatry.* 2009 May;17(5):359–67.
  20. Moher D, Shamseer L, Clarke M, Ghersi D, Liberati A, Petticrew M, et al. Preferred reporting items for systematic review and meta-analysis protocols (PRISMA-P) 2015 statement. *Syst Rev.* 2015 Dec;4(1):1.



- 1
  - 2
  - 3
  - 4
  - 5
  - 6
  - 7
  - 8
  - 9
  - 10
  - 11
  - 12
  - 13
  - 14
  - 15
  - 16
  - 17
  - 18
  - 19
  - 20
  - 21
  - 22
  - 23
  - 24
  - 25
  - 26
  - 27
  - 28
  - 29
  - 30
  - 31
  - 32
  - 33
  - 34
  - 35
  - 36
  - 37
  - 38
  - 39
  - 40
  - 41
  - 42
  - 43
  - 44
  - 45
  - 46
  - 47
  - 48
  - 49
  - 50
  - 51
  - 52
  - 53
  - 54
  - 55
  - 56
  - 57
  - 58
  - 59
  - 60
21. Behera P, Pilia M, Yadav V, Bairwa M, Dabar D, Behera S. Estimation of prevalence of depression in elderly population using diagnostic methods in India: a systematic review and meta-analysis (PROSPERO CRD42019138453) [Internet]. National Institute of Health Research (NHS); 2019. Available from: [https://www.crd.york.ac.uk/prospERO/export\\_details\\_pdf.php.ID=CRD42019138453](https://www.crd.york.ac.uk/prospERO/export_details_pdf.php.ID=CRD42019138453)
22. Ouzzani M, Hammady H, Fedorowicz Z, Elmagarmid A. Rayyan—a web and mobile app for systematic reviews. *Syst Rev*. 2016 Dec 5;5(1):210.
23. Mendeley Desktop Software [Internet]. [cited 2019 Jul 16]. Available from: <https://www.mendeley.com/download-desktop/>
24. Downes MJ, Brennan ML, Williams HC, Dean RS. Development of a critical appraisal tool to assess the quality of cross-sectional studies (AXIS). *BMJ Open*. 2016 Dec 1;6(12):e011458.
25. Higgins, Green S, editors. Meta-regression. In: *Cochrane Handbook for Systematic Reviews of Interventions* [Internet]. Version 5.1.0. The Cochrane Collaboration; 2011 [cited 2019 Sep 9]. Available from: [https://handbook-5-1.cochrane.org/chapter\\_9/9\\_6\\_4\\_meta\\_regression.htm](https://handbook-5-1.cochrane.org/chapter_9/9_6_4_meta_regression.htm)
26. Leimu Roosa, Koricheva Julia. Cumulative meta-analysis: a new tool for detection of temporal trends and publication bias in ecology. *Proc R Soc Lond B Biol Sci*. 2004 Sep 22;271(1551):1961–6.
27. Quality and size [Mar 2002; 97-3] [Internet]. Bandolier - Evidence based thinking about healthcare. [cited 2019 Sep 9]. Available from: <http://www.bandolier.org.uk/band97/b97-3.html#Heading7>
28. StataCorp. *Stata Statistical Software: Release 15*. College Station, TX: StataCorp LLC; 2017.
29. Schwarzer G. Meta: An R package for meta-analysis. *R News*. 2007;7(3):40-5.
30. Viechtbauer W. Conducting Meta-Analyses in R with the metafor Package. *Journal of Statistical Software*. 2010;36(3):1-48.
31. Barendregt JJ, Doi SA, Lee YY, Norman RE, Vos T. Meta-analysis of prevalence. *J Epidemiol Community Health*. 2013 Nov 1;67(11):974–8.
32. Higgins JP, Green S, editors. Sensitivity analyses. In: *Cochrane Handbook for Systematic Reviews of Interventions* [Internet]. Version 5.1.0. The Cochrane Collaboration; 2011 [cited 2019 Sep 9]. Available from: [https://handbook-5-1.cochrane.org/chapter\\_9/9\\_7\\_sensitivity\\_analyses.htm](https://handbook-5-1.cochrane.org/chapter_9/9_7_sensitivity_analyses.htm)
33. Viechtbauer W, Cheung MW-L. Outlier and influence diagnostics for meta-analysis. *Res Synth Methods*. 2010;1(2):112–25.
34. Allen IE, Seaman CA. The Trusty Jackknife. Method identifies outliers and bias in statistical estimates. [Internet]. *Quality Progress*. The Official Publication of ASQ.



[cited 2019 Sep 7]. Available from: <http://asq.org/quality-progress/2008/07/statistics-roundtable/statistics-roundtable-the-trusty-jackknife.html>

35. Behera P, Gupta SK, Nongkynrih B, Kant S, Mishra AK, Sharan P. Screening instruments for assessment of depression. *Indian J Med Spec.* 2017 Jan 1;8(1):31–7.
36. Gururaj G, Varghese M, Benegal V, Rao G, Pathak K, Singh L, et al. National Mental Health Survey of India, 2015-16: Prevalence, Pattern, and Outcomes [Internet]. Bengaluru: National Institute of Mental Health and Neuro Sciences; 2016. Report No.: NIMHANS Publication No. 129, 2016. Available from: <http://www.nimhans.ac.in/national-mental-health-survey-2015-16>
37. Bromet E, Andrade LH, Hwang I, Sampson NA, Alonso J, de Girolamo G, et al. Cross-national epidemiology of DSM-IV major depressive episode. *BMC Med.* 2011 Jul 26;9(1):90.

1 Appendix 1  
2  
3

4 **Reporting checklist for protocol of a systematic**  
5 **review.**  
6  
7  
8  
9

10 Based on the PRISMA-P guidelines.  
11

12  
13 **Instructions to authors**  
14

15 Complete this checklist by entering the page numbers from your manuscript where readers will find each of the  
16 items listed below.  
17

18  
19 Your article may not currently address all the items on the checklist. Please modify your text to include the  
20 missing information. If you are certain that an item does not apply, please write "n/a" and provide a short  
21 explanation.  
22

23  
24 Upload your completed checklist as an extra file when you submit to a journal.  
25

26 In your methods section, say that you used the PRISMA-Preporting guidelines, and cite them as:  
27

28 Moher D, Shamseer L, Clarke M, Ghersi D, Liberati A, Petticrew M, Shekelle P, Stewart LA. Preferred  
29 Reporting Items for Systematic Review and Meta-Analysis Protocols (PRISMA-P) 2015 statement. Syst Rev.  
30 2015;4(1):1.  
31  
32

|                     |                     | Reporting Item                                                                                                                            | Page Number |
|---------------------|---------------------|-------------------------------------------------------------------------------------------------------------------------------------------|-------------|
| <b>Title</b>        |                     |                                                                                                                                           |             |
| Identification      | <a href="#">#1a</a> | Identify the report as a protocol of a systematic review                                                                                  | 1,3         |
| Update              | <a href="#">#1b</a> | If the protocol is for an update of a previous systematic review, identify as such                                                        | N/A         |
| <b>Registration</b> |                     |                                                                                                                                           |             |
|                     | <a href="#">#2</a>  | If registered, provide the name of the registry (such as PROSPERO) and registration number                                                | 2,4         |
| <b>Authors</b>      |                     |                                                                                                                                           |             |
| Contact             | <a href="#">#3a</a> | Provide name, institutional affiliation, e-mail address of all protocol authors; provide physical mailing address of corresponding author | 1           |

|    |                           |                     |                                                                                                                                                                                                                               |                                                              |
|----|---------------------------|---------------------|-------------------------------------------------------------------------------------------------------------------------------------------------------------------------------------------------------------------------------|--------------------------------------------------------------|
| 1  | Contribution              | <a href="#">#3b</a> | Describe contributions of protocol authors and identify the guarantor of the review                                                                                                                                           | 9                                                            |
| 2  |                           |                     |                                                                                                                                                                                                                               |                                                              |
| 3  |                           |                     |                                                                                                                                                                                                                               |                                                              |
| 4  | <b>Amendments</b>         |                     |                                                                                                                                                                                                                               |                                                              |
| 5  |                           |                     |                                                                                                                                                                                                                               |                                                              |
| 6  |                           |                     |                                                                                                                                                                                                                               |                                                              |
| 7  |                           | <a href="#">#4</a>  | If the protocol represents an amendment of a previously completed or published protocol, identify as such and list changes; otherwise, state plan for documenting important protocol amendments                               | N/A; not a significant amendment is planned in the protocol. |
| 8  |                           |                     |                                                                                                                                                                                                                               |                                                              |
| 9  |                           |                     |                                                                                                                                                                                                                               |                                                              |
| 10 |                           |                     |                                                                                                                                                                                                                               |                                                              |
| 11 |                           |                     |                                                                                                                                                                                                                               |                                                              |
| 12 |                           |                     |                                                                                                                                                                                                                               |                                                              |
| 13 |                           |                     |                                                                                                                                                                                                                               |                                                              |
| 14 | <b>Support</b>            |                     |                                                                                                                                                                                                                               |                                                              |
| 15 |                           |                     |                                                                                                                                                                                                                               |                                                              |
| 16 |                           |                     |                                                                                                                                                                                                                               |                                                              |
| 17 | Sources                   | <a href="#">#5a</a> | Indicate sources of financial or other support for the review                                                                                                                                                                 | 9                                                            |
| 18 |                           |                     |                                                                                                                                                                                                                               |                                                              |
| 19 |                           |                     |                                                                                                                                                                                                                               |                                                              |
| 20 | Sponsor                   | <a href="#">#5b</a> | Provide name for the review funder and / or sponsor                                                                                                                                                                           | N/A                                                          |
| 21 |                           |                     |                                                                                                                                                                                                                               |                                                              |
| 22 |                           |                     |                                                                                                                                                                                                                               |                                                              |
| 23 |                           |                     |                                                                                                                                                                                                                               |                                                              |
| 24 | Role of sponsor or funder | <a href="#">#5c</a> | Describe roles of funder(s), sponsor(s), and / or institution(s), if any, in developing the protocol                                                                                                                          | N/A                                                          |
| 25 |                           |                     |                                                                                                                                                                                                                               |                                                              |
| 26 |                           |                     |                                                                                                                                                                                                                               |                                                              |
| 27 |                           |                     |                                                                                                                                                                                                                               |                                                              |
| 28 |                           |                     |                                                                                                                                                                                                                               |                                                              |
| 29 | <b>Introduction</b>       |                     |                                                                                                                                                                                                                               |                                                              |
| 30 |                           |                     |                                                                                                                                                                                                                               |                                                              |
| 31 | Rationale                 | <a href="#">#6</a>  | Describe the rationale for the review in the context of what is already known                                                                                                                                                 | 3                                                            |
| 32 |                           |                     |                                                                                                                                                                                                                               |                                                              |
| 33 |                           |                     |                                                                                                                                                                                                                               |                                                              |
| 34 | Objectives                | <a href="#">#7</a>  | Provide an explicit statement of the question(s) the review will address with reference to participants, interventions, comparators, and outcomes (PICO)                                                                      | 4                                                            |
| 35 |                           |                     |                                                                                                                                                                                                                               |                                                              |
| 36 |                           |                     |                                                                                                                                                                                                                               |                                                              |
| 37 |                           |                     |                                                                                                                                                                                                                               |                                                              |
| 38 |                           |                     |                                                                                                                                                                                                                               |                                                              |
| 39 |                           |                     |                                                                                                                                                                                                                               |                                                              |
| 40 |                           |                     |                                                                                                                                                                                                                               |                                                              |
| 41 | <b>Methods</b>            |                     |                                                                                                                                                                                                                               |                                                              |
| 42 |                           |                     |                                                                                                                                                                                                                               |                                                              |
| 43 | Eligibility criteria      | <a href="#">#8</a>  | Specify the study characteristics (such as PICO, study design, setting, time frame) and report characteristics (such as years considered, language, publication status) to be used as criteria for eligibility for the review | 4                                                            |
| 44 |                           |                     |                                                                                                                                                                                                                               |                                                              |
| 45 |                           |                     |                                                                                                                                                                                                                               |                                                              |
| 46 |                           |                     |                                                                                                                                                                                                                               |                                                              |
| 47 |                           |                     |                                                                                                                                                                                                                               |                                                              |
| 48 |                           |                     |                                                                                                                                                                                                                               |                                                              |
| 49 |                           |                     |                                                                                                                                                                                                                               |                                                              |
| 50 |                           |                     |                                                                                                                                                                                                                               |                                                              |
| 51 |                           |                     |                                                                                                                                                                                                                               |                                                              |
| 52 | Information sources       | <a href="#">#9</a>  | Describe all intended information sources (such as electronic databases, contact with study authors, trial registers or other grey literature sources) with planned dates of coverage                                         | 4                                                            |
| 53 |                           |                     |                                                                                                                                                                                                                               |                                                              |
| 54 |                           |                     |                                                                                                                                                                                                                               |                                                              |
| 55 |                           |                     |                                                                                                                                                                                                                               |                                                              |
| 56 |                           |                     |                                                                                                                                                                                                                               |                                                              |
| 57 |                           |                     |                                                                                                                                                                                                                               |                                                              |
| 58 |                           |                     |                                                                                                                                                                                                                               |                                                              |
| 59 |                           |                     |                                                                                                                                                                                                                               |                                                              |
| 60 |                           |                     |                                                                                                                                                                                                                               |                                                              |

|    |                    |                      |                                                                                                                                                                                                                                                           |     |
|----|--------------------|----------------------|-----------------------------------------------------------------------------------------------------------------------------------------------------------------------------------------------------------------------------------------------------------|-----|
| 1  | Search strategy    | <a href="#">#10</a>  | Present draft of search strategy to be used for at least one electronic database, including planned limits, such that it could be repeated                                                                                                                | 4-5 |
| 2  |                    |                      |                                                                                                                                                                                                                                                           |     |
| 3  |                    |                      |                                                                                                                                                                                                                                                           |     |
| 4  |                    |                      |                                                                                                                                                                                                                                                           |     |
| 5  |                    |                      |                                                                                                                                                                                                                                                           |     |
| 6  |                    |                      |                                                                                                                                                                                                                                                           |     |
| 7  | Study records -    | <a href="#">#11a</a> | Describe the mechanism(s) that will be used to manage records and data throughout the review                                                                                                                                                              | 5   |
| 8  | data               |                      |                                                                                                                                                                                                                                                           |     |
| 9  | management         |                      |                                                                                                                                                                                                                                                           |     |
| 10 |                    |                      |                                                                                                                                                                                                                                                           |     |
| 11 |                    |                      |                                                                                                                                                                                                                                                           |     |
| 12 | Study records -    | <a href="#">#11b</a> | State the process that will be used for selecting studies (such as two independent reviewers) through each phase of the review (that is, screening, eligibility and inclusion in meta-analysis)                                                           | 5-6 |
| 13 | selection process  |                      |                                                                                                                                                                                                                                                           |     |
| 14 |                    |                      |                                                                                                                                                                                                                                                           |     |
| 15 |                    |                      |                                                                                                                                                                                                                                                           |     |
| 16 |                    |                      |                                                                                                                                                                                                                                                           |     |
| 17 |                    |                      |                                                                                                                                                                                                                                                           |     |
| 18 |                    |                      |                                                                                                                                                                                                                                                           |     |
| 19 |                    |                      |                                                                                                                                                                                                                                                           |     |
| 20 | Study records -    | <a href="#">#11c</a> | Describe planned method of extracting data from reports (such as piloting forms, done independently, in duplicate), any processes for obtaining and confirming data from investigators                                                                    | 6   |
| 21 | data collection    |                      |                                                                                                                                                                                                                                                           |     |
| 22 | process            |                      |                                                                                                                                                                                                                                                           |     |
| 23 |                    |                      |                                                                                                                                                                                                                                                           |     |
| 24 |                    |                      |                                                                                                                                                                                                                                                           |     |
| 25 |                    |                      |                                                                                                                                                                                                                                                           |     |
| 26 |                    |                      |                                                                                                                                                                                                                                                           |     |
| 27 | Data items         | <a href="#">#12</a>  | List and define all variables for which data will be sought (such as PICO items, funding sources), any pre-planned data assumptions and simplifications                                                                                                   | 6   |
| 28 |                    |                      |                                                                                                                                                                                                                                                           |     |
| 29 |                    |                      |                                                                                                                                                                                                                                                           |     |
| 30 |                    |                      |                                                                                                                                                                                                                                                           |     |
| 31 |                    |                      |                                                                                                                                                                                                                                                           |     |
| 32 |                    |                      |                                                                                                                                                                                                                                                           |     |
| 33 |                    |                      |                                                                                                                                                                                                                                                           |     |
| 34 | Outcomes and       | <a href="#">#13</a>  | List and define all outcomes for which data will be sought, including prioritization of main and additional outcomes, with rationale                                                                                                                      | 6   |
| 35 | prioritization     |                      |                                                                                                                                                                                                                                                           |     |
| 36 |                    |                      |                                                                                                                                                                                                                                                           |     |
| 37 |                    |                      |                                                                                                                                                                                                                                                           |     |
| 38 |                    |                      |                                                                                                                                                                                                                                                           |     |
| 39 | Risk of bias in    | <a href="#">#14</a>  | Describe anticipated methods for assessing risk of bias of individual studies, including whether this will be done at the outcome or study level, or both; state how this information will be used in data synthesis                                      | 6   |
| 40 | individual studies |                      |                                                                                                                                                                                                                                                           |     |
| 41 |                    |                      |                                                                                                                                                                                                                                                           |     |
| 42 |                    |                      |                                                                                                                                                                                                                                                           |     |
| 43 |                    |                      |                                                                                                                                                                                                                                                           |     |
| 44 |                    |                      |                                                                                                                                                                                                                                                           |     |
| 45 |                    |                      |                                                                                                                                                                                                                                                           |     |
| 46 | Data synthesis     | <a href="#">#15a</a> | Describe criteria under which study data will be quantitatively synthesised                                                                                                                                                                               | 6-8 |
| 47 |                    |                      |                                                                                                                                                                                                                                                           |     |
| 48 |                    |                      |                                                                                                                                                                                                                                                           |     |
| 49 |                    |                      |                                                                                                                                                                                                                                                           |     |
| 50 | Data synthesis     | <a href="#">#15b</a> | If data are appropriate for quantitative synthesis, describe planned summary measures, methods of handling data and methods of combining data from studies, including any planned exploration of consistency (such as I <sup>2</sup> , Kendall's $\tau$ ) | 7-8 |
| 51 |                    |                      |                                                                                                                                                                                                                                                           |     |
| 52 |                    |                      |                                                                                                                                                                                                                                                           |     |
| 53 |                    |                      |                                                                                                                                                                                                                                                           |     |
| 54 |                    |                      |                                                                                                                                                                                                                                                           |     |
| 55 |                    |                      |                                                                                                                                                                                                                                                           |     |
| 56 |                    |                      |                                                                                                                                                                                                                                                           |     |
| 57 |                    |                      |                                                                                                                                                                                                                                                           |     |
| 58 |                    |                      |                                                                                                                                                                                                                                                           |     |
| 59 |                    |                      |                                                                                                                                                                                                                                                           |     |
| 60 |                    |                      |                                                                                                                                                                                                                                                           |     |

|    |                |                      |                                                                                                                               |                                                                                                                                                                                    |
|----|----------------|----------------------|-------------------------------------------------------------------------------------------------------------------------------|------------------------------------------------------------------------------------------------------------------------------------------------------------------------------------|
| 1  | Data synthesis | <a href="#">#15c</a> | Describe any proposed additional analyses (such as sensitivity or subgroup analyses, meta-regression)                         | 7-8                                                                                                                                                                                |
| 2  |                |                      |                                                                                                                               |                                                                                                                                                                                    |
| 3  |                |                      |                                                                                                                               |                                                                                                                                                                                    |
| 4  |                |                      |                                                                                                                               |                                                                                                                                                                                    |
| 5  |                |                      |                                                                                                                               |                                                                                                                                                                                    |
| 6  | Data synthesis | <a href="#">#15d</a> | If quantitative synthesis is not appropriate, describe the type of summary planned                                            | 6                                                                                                                                                                                  |
| 7  |                |                      |                                                                                                                               |                                                                                                                                                                                    |
| 8  |                |                      |                                                                                                                               |                                                                                                                                                                                    |
| 9  | Meta-bias(es)  | <a href="#">#16</a>  | Specify any planned assessment of meta-bias(es) (such as publication bias across studies, selective reporting within studies) | 7                                                                                                                                                                                  |
| 10 |                |                      |                                                                                                                               |                                                                                                                                                                                    |
| 11 |                |                      |                                                                                                                               |                                                                                                                                                                                    |
| 12 |                |                      |                                                                                                                               |                                                                                                                                                                                    |
| 13 |                |                      |                                                                                                                               |                                                                                                                                                                                    |
| 14 | Confidence in  | <a href="#">#17</a>  | Describe how the strength of the body of evidence will be assessed (such as GRADE)                                            | N/A; almost all studies will be cross-sectional studies, hence, the use of GRADE is not required, however, heterogeneity will be assessed using subgroup and sensitivity analyses. |
| 15 | cumulative     |                      |                                                                                                                               |                                                                                                                                                                                    |
| 16 | evidence       |                      |                                                                                                                               |                                                                                                                                                                                    |
| 17 |                |                      |                                                                                                                               |                                                                                                                                                                                    |
| 18 |                |                      |                                                                                                                               |                                                                                                                                                                                    |
| 19 |                |                      |                                                                                                                               |                                                                                                                                                                                    |
| 20 |                |                      |                                                                                                                               |                                                                                                                                                                                    |
| 21 |                |                      |                                                                                                                               |                                                                                                                                                                                    |
| 22 |                |                      |                                                                                                                               |                                                                                                                                                                                    |
| 23 | Notes:         |                      |                                                                                                                               |                                                                                                                                                                                    |

## Notes:

- 4: N/A; not a significant amendment is planned in the protocol.
- 17: N/A; almost all studies will be cross-sectional studies, hence, the use GRADE is not required, however, heterogeneity will be assessed using subgroup and sensitivity analyses.
- The PRISMA-P checklist is distributed under the terms of the Creative Commons Attribution License CC-BY 4.0. This checklist was completed on 15. September 2019 using <https://www.goodreports.org/>, a tool made by the [EQUATOR Network](#) in collaboration with [Penelope.ai](#)

# BMJ Open

## A systematic review protocol for estimation of the prevalence of depression using diagnostic instruments in the elderly population in India, 2000-2019

|                                 |                                                                                                                                                                                                                                                                                                                                                                                                                                                                                                                                                                             |
|---------------------------------|-----------------------------------------------------------------------------------------------------------------------------------------------------------------------------------------------------------------------------------------------------------------------------------------------------------------------------------------------------------------------------------------------------------------------------------------------------------------------------------------------------------------------------------------------------------------------------|
| Journal:                        | <i>BMJ Open</i>                                                                                                                                                                                                                                                                                                                                                                                                                                                                                                                                                             |
| Manuscript ID                   | bmjopen-2019-034330.R1                                                                                                                                                                                                                                                                                                                                                                                                                                                                                                                                                      |
| Article Type:                   | Protocol                                                                                                                                                                                                                                                                                                                                                                                                                                                                                                                                                                    |
| Date Submitted by the Author:   | 04-Mar-2020                                                                                                                                                                                                                                                                                                                                                                                                                                                                                                                                                                 |
| Complete List of Authors:       | Behera, Priyamadhaba; AIIMS, Raebareli, Department of Community and Family Medicine<br>Pilania, Manju; RUHS College of Medical Sciences, Department of Community Medicine<br>Yadav, Vikas; Atal Bihari Vajpayee Government Medical College, Department of Community Medicine<br>Bairwa, Mohan; AIIMS, Centre for Community Medicine<br>Dabar, Deepti; AIIMS Bhopal<br>Behera, Surama; Regional Medical Research Centre Bhubaneswar<br>Poongothai, S.; Madras Diabetes Research Foundation<br>Mohan, V; Madras Diabetes Research Foundation<br>Gupta, Shiv; IIHMR University |
| <b>Primary Subject Heading</b>: | Epidemiology                                                                                                                                                                                                                                                                                                                                                                                                                                                                                                                                                                |
| Secondary Subject Heading:      | Geriatric medicine, Mental health                                                                                                                                                                                                                                                                                                                                                                                                                                                                                                                                           |
| Keywords:                       | Prevalence, Elderly, India, Depression, Diagnostic tool                                                                                                                                                                                                                                                                                                                                                                                                                                                                                                                     |
|                                 |                                                                                                                                                                                                                                                                                                                                                                                                                                                                                                                                                                             |

SCHOLARONE™  
Manuscripts



I, the Submitting Author has the right to grant and does grant on behalf of all authors of the Work (as defined in the below author licence), an exclusive licence and/or a non-exclusive licence for contributions from authors who are: i) UK Crown employees; ii) where BMJ has agreed a CC-BY licence shall apply, and/or iii) in accordance with the terms applicable for US Federal Government officers or employees acting as part of their official duties; on a worldwide, perpetual, irrevocable, royalty-free basis to BMJ Publishing Group Ltd ("BMJ") its licensees and where the relevant Journal is co-owned by BMJ to the co-owners of the Journal, to publish the Work in this journal and any other BMJ products and to exploit all rights, as set out in our [licence](#).

The Submitting Author accepts and understands that any supply made under these terms is made by BMJ to the Submitting Author unless you are acting as an employee on behalf of your employer or a postgraduate student of an affiliated institution which is paying any applicable article publishing charge ("APC") for Open Access articles. Where the Submitting Author wishes to make the Work available on an Open Access basis (and intends to pay the relevant APC), the terms of reuse of such Open Access shall be governed by a Creative Commons licence – details of these licences and which [Creative Commons](#) licence will apply to this Work are set out in our licence referred to above.

Other than as permitted in any relevant BMJ Author's Self Archiving Policies, I confirm this Work has not been accepted for publication elsewhere, is not being considered for publication elsewhere and does not duplicate material already published. I confirm all authors consent to publication of this Work and authorise the granting of this licence.

1  
2  
3  
4  
5  
6  
7  
8  
9  
10  
11  
12  
13  
14  
15  
16  
17  
18  
19  
20  
21  
22  
23  
24  
25  
26  
27  
28  
29  
30  
31  
32  
33  
34  
35  
36  
37  
38  
39  
40  
41  
42  
43  
44  
45  
46  
47  
48  
49  
50  
51  
52  
53  
54  
55  
56  
57  
58  
59  
60

1 **A systematic review protocol for estimation of the prevalence of depression**  
2 **using diagnostic instruments in the elderly population in India, 2000-2019**

3  
4 **Authors**

5  
6 <sup>1</sup>Priyamadhava Behera, M.D., AIIMS, Raebareli, India  
7 Email: [priya.madhaba@gmail.com](mailto:priya.madhaba@gmail.com)

8 <sup>2</sup>Manju Pilania, M.D., RUHS College of Medical Sciences, Jaipur, India  
9 Email: [drmanjupilania@gmail.com](mailto:drmanjupilania@gmail.com)

10 <sup>3</sup>Vikas Yadav, M.D., Atal Bihari Vajpayee Government Medical College, Vidisha, India  
11 Email: [drvikasyadav@gmail.com](mailto:drvikasyadav@gmail.com)

12 <sup>4</sup>Mohan Bairwa, M.D., AIIMS, New Delhi, India  
13 Email: [drmohanbairwa@gmail.com](mailto:drmohanbairwa@gmail.com)

14 <sup>5</sup>Deepti Dabar, M.D., AIIMS, Bhopal, India  
15 Email ID: [deepti.dabar@gmail.com](mailto:deepti.dabar@gmail.com)

16 <sup>6</sup>Surama Manjari Behera, MPH (student), RMRC-ICMR, Bhubaneswar, India  
17 Email: [surama.m92@gmail.com](mailto:surama.m92@gmail.com)

18 <sup>7</sup>S. Poongothai, Ph.D., Madras Diabetes Research Foundation, Chennai, India  
19 Email: [poongothaisubramani@gmail.com](mailto:poongothaisubramani@gmail.com)

20 <sup>8</sup>Viswanathan Mohan, M.D., Ph.D., Madras Diabetes Research Foundation, Chennai, India  
21 Email: [drmohans@diabetes.ind.in](mailto:drmohans@diabetes.ind.in)

22 <sup>9</sup>Shiv Dutt Gupta, M.D., Ph.D., IIHMR University, Jaipur, India  
23 Email: [sdgupta@iihmr.edu.in](mailto:sdgupta@iihmr.edu.in)

24  
25 **Short Title:** Estimation of depression prevalence in the elderly population in India  
26

27 **Corresponding Author**

28 Dr. Mohan Bairwa, MD  
29 Centre for Community Medicine,  
30 All India Institute of Medical Sciences,  
31 Ansari Nagar, New Delhi, India – 302029  
32 Email ID: [drmohanbairwa@gmail.com](mailto:drmohanbairwa@gmail.com)



## 34 **Abstract**

35 **Introduction:** Depression is a common mental disorder in the elderly population, which  
36 significantly impacts their quality of life. However, correct estimates of its magnitude are not  
37 available in the elderly in India. The present systematic review and meta-analysis would  
38 attempt to estimate the prevalence of depression using diagnostic instruments among elderly  
39 persons aged 60 years and above.

40 **Methods and analysis:** Searches will be performed in PubMed, Scopus, Embase, Web of  
41 Science, CINAHL, and PsycINFO. Community-based cross-sectional and cohort studies (2001  
42 – 9/2019) reporting the prevalence of depression in the elderly; using diagnostic instruments  
43 will be included. Studies conducted among chronic disease patients, in-hospital patients, and  
44 special groups such as with disaster-stricken populations, and studies reporting the only 1 or 2  
45 subcategories of depression, will be excluded. Disagreements in study selection and data  
46 abstraction will be resolved by consensus and arbitration by a third reviewer. AXIS critical  
47 appraisal tool will be used for quality assessment of individual studies. Findings of eligible  
48 studies will be pooled using fixed-effects or random-effects meta-analysis whichever is  
49 appropriate. Heterogeneity between studies will be examined by Cochran's Q test and  
50 quantified by I<sup>2</sup> statistic. A cumulative meta-analysis will be used to detect temporal trends in  
51 the prevalence of depression and the effect of poor-quality studies on the pooled estimate.  
52 Publication bias will be assessed by visual inspection of funnel plots and the Egger test.

53 **Ethics and dissemination:** No ethical approval will be needed because it will be a systematic  
54 review. Data from previously published studies will be retrieved and analyzed. Findings will  
55 be disseminated through a peer-reviewed publication in a scientific journal and conferences.

56  
57 **PROSPERO** registration number CRD42019138453.

58  
59 **Keywords:** Prevalence, Depression, India, Elderly, Diagnostic tool, Systematic review

60

61

1  
2  
3  
4  
5  
62 **Strengths and limitations of this study**

- 6  
7  
8  
9  
10  
11  
12  
13  
14  
15  
16  
17  
18  
19  
20  
21  
22  
23  
24  
25  
26  
27  
28  
29  
30  
31  
32  
33  
34  
35  
36  
37  
38  
39  
40  
41  
42  
43  
44  
45  
46  
47  
48  
49  
50  
51  
52  
53  
54  
55  
56  
57  
58  
59  
60
- 63 • It is a first-ever systematic review of depression prevalence in India based on diagnostic  
64 instruments only.
  - 65 • Meta-analytic techniques such as cumulative meta-analysis, leave-one-out (jack-knife  
66 estimation) meta-analysis, and meta-regression will enrich the analysis and provide the  
67 estimate of prevalence nearer to the population estimate.
  - 68 • A comprehensive synthesis of all available depression prevalence data in India using a  
69 standardized risk of bias tool.
  - 70 • The protocol adheres to Preferred Reporting Items for Systematic Reviews and Meta-  
71 Analyses Protocols guidelines.
  - 72 • Heterogeneity in methodologies, such as diagnostic criteria, study duration, sampling  
73 design, and study locations may limit comparison across studies.

74  
75 **Word count: 2270**

1  
2  
3  
4  
5 76 **A systematic review protocol for estimation of the prevalence of depression**  
6  
7 77 **using diagnostic instruments in the elderly population in India, 2000-2019**  
8

9  
10 78 **Introduction**  
11

12 79 Mental disorders have emerged as one of the major health problems in India and globally.  
13  
14 80 Being chronic in nature, they significantly impact the quality of life (1–3). Depression is the  
15  
16 81 most common mental disorder affecting 322 million people globally, with a prevalence ranging  
17  
18 82 from 4 to 13% for minor depression and 1 to 4% for major depression (4–6). Depression affects  
19  
20 83 not only the quality of life but also increases the risk of all-cause mortality, including  
21  
22 84 cardiovascular diseases and stroke (7). The Global Burden of Disease study projected that  
23  
24 85 depression will be the leading cause of Disability-Adjusted Life Years (DALY) in developing  
25  
26 86 countries by 2020 (8). Depression has emerged out as a significant risk factor for suicidality  
27  
28 87 and suicide deaths in India (9). With the rapid population aging, the proportion of elderly  
29  
30 88 persons is estimated to increase from 12% to 22% between 2015 and 2050 in the world. In  
31  
32 89 India, the figure will rise from the current 8.6% in 2011 to 19% by 2050 (10,11). This  
33  
34 90 underscores the significant health burden depression will place on elderly people in India in  
35  
36 91 the years to come. In India, “elderly persons” are those who have attained the age of 60 years  
37  
38 92 and above (12,13).  
39

40 93  
41 94 Depression is both an underdiagnosed and undertreated mental disorder in elderly persons, and  
42  
43 95 its varied presentation makes its diagnosis difficult. Elderly persons with depression have  
44  
45 96 poorer functioning as compared to people in a similar age group without depression and have  
46  
47 97 increased health care costs (6,14). Even though India’s population is rapidly aging, little is  
48  
49 98 known about the magnitude of depression at the national and regional levels. The estimated  
50  
51 99 prevalence of depression among elderly persons from rural community-based studies of India  
52  
53 100 varied highly from 12.7% to 53.7% (15). With this background, we attempted to estimate the  
54  
55 101 prevalence of depression in the elderly population in India, using published studies that  
56  
57 102 employed standardized screening tests to identify depression (16). That study could have  
58  
59 103 provided a higher estimate of the depression prevalence in elderly people as the screening tests  
60  
104 might have overestimated the prevalence, given the higher sensitivity of the screening tests,  
105  
106 105 albeit their low specificity. Indeed, the screening tests blur the distinctions between low and  
high prevalence populations due to false positives (17–19).

1  
2  
3  
4 107 Moreover, the prevalence studies vary in methodologies, including variable sensitivity and  
5  
6 108 specificity of screening of tests, geographical and cultural characteristics, and level of expertise  
7  
8 109 among the investigators (20–22). Nevertheless, these studies indicated that the prevalence of  
9  
10 110 depression should be estimated using reliable and validated diagnostic tools to identify  
11  
12 111 depression more accurately and to help with planning and health systems management (16,19).  
13  
14 112 A comprehensive clinical interview using a sensitive and specific diagnostic tool is the gold  
15  
16 113 standard for confirming a diagnosis of depression, which also helps plan the appropriate  
17  
18 114 therapy (23). Therefore, we designed this systematic review and meta-analysis to estimate the  
19  
20 115 prevalence of depression by including the studies that have used diagnostic instruments among  
21  
22 116 elderly persons in India.

## 117 **Methods**

118 The protocol has been prepared following the Preferred Reporting Items for Systematic  
119  
120 Reviews and Meta-analysis Protocol (PRISMA-P) (24), which provides a standardized guide  
121  
122 for performing systematic reviews and meta-analysis (Appendix 1. PRISMA-P checklist). The  
123  
124 protocol has been registered on PROSPERO (CRD42019138453) (25).

### 122 **Eligibility criteria**

123 The elderly population aged 60 years and above in India is the population of interest. This  
124  
125 review will include the studies with the following eligibility criteria:

#### 125 *Inclusion criteria:*

- 126 1) Community-based cross-sectional and cohort studies published during 01/2001 –  
127 9/2019
- 128 2) Studies that reported the prevalence of depression/ depressive symptoms using  
129 diagnostic instruments for identifying depression. “Diagnostic instruments” are tools  
130 that diagnose depression by the International Classification of Diseases criteria and/or  
131 Diagnostic and Statistical Manual of Mental Disorders criteria (26).

#### 132 *Exclusion criteria*

- 133 1) Studies among elderly patients with chronic diseases such as diabetes, HIV/AIDS, etc,  
134 in-hospital patients, and other special groups such as with disaster-stricken  
135 experiences.

1  
2  
3  
4 136 2) Studies which reported either 1 or 2 subcategories of depression (mild, moderate and  
5  
6 137 severe) only

7  
8 138 3) Studies in which unstructured clinician-defined diagnosis  
9

### 10 139 **Information sources**

11  
12 140 Searches will be performed in PubMed, Scopus, Embase, Web of Science, CINAHL, and  
13  
14 141 PsycINFO. To enrich and supplement the literature search, the references of selected articles  
15  
16 142 and relevant reviews will be scanned. Then, we will circulate a list of identified articles to the  
17  
18 143 systematic review team, as well as to the selected experts working in this field to ensure the  
19  
20 144 completeness of search results.

### 21 22 145 **Search strategy**

23  
24 146 Initially, controlled descriptors (such as MeSH terms, CINAHL headings, PsycINFO  
25  
26 147 thesaurus) will be identified in each database. Following keywords such as “psychiatric”,  
27  
28 148 “depression”, “mental”, “depressive disorders”, “aged”, “geriatric”, “elderly”, “old aged”,  
29  
30 149 “aging”, “prevalence”, “epidemiological studies”, “epidemiology”, and “India” will be used to  
31  
32 150 develop the search strategy. Appropriate Boolean operators will be employed. We will not  
33  
34 151 impose any language filter. The search will be limited to human subjects. The search strategy  
35  
36 152 for PubMed is given below:

37 153 #1. psychiatric OR depressi\* OR mental OR "Depression"[Mesh] OR "Depressive  
38 154 Disorder"[Mesh]

39  
40 155 #2. "Aged"[Mesh] OR geriatric OR elder\* OR "old aged" OR aging

41  
42 156 #3. "Prevalence"[Mesh] OR prevalence OR "Epidemiology"[Mesh] OR  
43  
44 157 “epidemiological stud\*”

45  
46 158 #4. India

47  
48 159 #5. #1 AND #2 AND #3 AND #4

49  
50 160 #6. Filters: Publication date from 2001/01/01, Humans.  
51

### 52 53 161 **Selection process and data management**

54  
55 162 Two reviewers (MP and PMB) will conduct searches in all identified databases. All search  
56  
57 163 results will be imported into Rayyan QCRI Software to ensure a systematic and  
58  
59

1  
2  
3  
4 164 comprehensive search and document the selection process (27). Another reviewer (VY) will  
5  
6 165 manage the Rayyan and identify and remove the duplicate citations and ensure an independent  
7  
8 166 review of titles and abstracts by blinding the decisions of both reviewers. MP and PMB will  
9  
10 167 review of titles and abstracts of the shortlisted citations in the Rayyan using a customized  
11  
12 168 inclusion/exclusion checklist (population-based studies; depression prevalence, study  
13  
14 169 duration, and India). After that, VY will identify the discrepancies between the two reviewers  
15  
16 170 in the Rayyan software and inform them of making a consensus for the selection of the study.  
17  
18 171 Full-text copies of all studies selected will be obtained to find more details. Both reviewers  
19  
20 172 will review the full-text copies of articles to identify whether diagnostic instruments have been  
21  
22 173 used to identify depression in the study participants.

23 174 We will record the reasons for the exclusion of all the studies for which we had obtained full  
24  
25 175 copies. Wherever the studies have been reported in multiple publications/reports, all papers  
26  
27 176 will be obtained. While the studies will be included as only one in the review, the data will be  
28  
29 177 extracted from all the publications to ensure the maximal relevant data is retrieved. The full-  
30  
31 178 text copies of all selected articles will be evaluated for quality assessment and data extraction.  
32  
33 179 The study selection process will be presented using the PRISMA flow chart describing the  
34  
35 180 reasons for the exclusion for the studies we will explore full texts.

36 181 The reference management software Mendeley Desktop for Windows will be used to store,  
37  
38 182 organize, cite, and manage all the selected references (28).

### 39 183 **Data extraction**

40  
41  
42 184 PMB and MP will independently perform data extraction on the key variables including study  
43  
44 185 details (author, year of publication); methods (study design, study location, study setting,  
45  
46 186 sample size, sampling method, non-response, age, sex, screening procedure, screening for  
47  
48 187 dementia, diagnostic instrument); and results (risk factors of depression studied and  
49  
50 188 prevalence data) will be extracted. Any disagreement in the data abstraction will be resolved  
51  
52 189 by consensus, and if required, the arbitration will be done by the members of the review team  
53  
54 190 (MB, VM, and SDG). First or corresponding authors will be contacted if additional  
55  
56 191 information is required in the selected articles.  
57  
58  
59  
60

## 192 **Risk of bias in individual studies**

193 AXIS critical appraisal tool will be used for quality assessment of the individual studies (29).  
194 The AXIS tool would emphasize mainly on the presented methods and results. The AXIS tool  
195 contains a 20-point questionnaire with “yes”, “no”, and “don’t know” answer that addresses  
196 study quality and reporting. The critical areas in the AXIS tool included are study design,  
197 sample size justification, target population, sampling frame, sample selection, measurement  
198 validity and reliability, overall methods, and conflict of interest and ethical issues.

## 199 **Strategy for data synthesis**

200 In this systematic review, extracted data will be presented in comprehensive tables and  
201 flowcharts. The pooling of prevalence will be done using meta-analysis. In case the relevant  
202 information is not available for meta-analysis, a narrative synthesis will be performed. The  
203 effect size of interest is the proportion of elderly people with depression. Data will be  
204 presented using a forest plot, including individual prevalence, pooled estimates, and 95%  
205 confidence intervals (CI). All pooled estimates will be calculated using an appropriate model  
206 (fixed or random-effects model meta-analysis), based on the level of heterogeneity.  
207 Heterogeneity between studies will be examined using Cochran’s Q test and quantified using  
208 the  $I^2$  statistic. A rough estimate of the heterogeneity will be as follows:  $I^2$  0% to 40% - might  
209 not be important;  $I^2$  30% to 60% - may represent moderate heterogeneity;  $I^2$  50% to 90% -  
210 may represent substantial heterogeneity; and  $I^2$  75% to 100% - considerable heterogeneity.  
211 The importance of the observed  $I^2$  value will depend on (i) magnitude and direction of effects  
212 and (ii) strength of evidence for heterogeneity. Sensitivity and subgroup analyses will be used  
213 to identify the causes of heterogeneity. If required, meta-regression will be employed to  
214 determine the sources of heterogeneity (30).

215 A cumulative meta-analysis will be done to detect temporal trends in the depression  
216 prevalence over the years and the effect of quality of studies. In the cumulative meta-analysis,  
217 the studies are added one at a time in a specified order (e.g., according to date of publication),  
218 and the results are summarised as each new study is added. In a forest plot of a cumulative  
219 meta-analysis, each horizontal line represents the summary of the results as each study is  
220 added, rather than the results of a single study (31,32). All analyses will be done using updated  
221 versions of STATA (33) and R software (with meta and metafor packages) (34,35).



## 222 *Assessment of publication bias*

223 We will assess the publication bias by visual inspection of funnel plots and testing using  
224 Egger's weighted regression, with  $p < 0.1$  considered indicative of statistically significant  
225 publication bias (36).

## 226 *Sensitivity analysis*

227 Sensitivity analysis (37) will be done to remove the influence of low-quality studies. We will  
228 also explore the effect of small studies (fewer than 100 participants) and the studies not  
229 fulfilling age criteria adequately, such as participants aged 65 years or more. In particular, the  
230 Leave-One-Out method (also known as Jackknife estimation) in which we recalculate the  
231 results of our meta-analysis  $K-1$  times (where  $K$  is a total number of studies), each time  
232 leaving out one study. We will then compare the new pooled prevalence with that of the  
233 original pooled prevalence of depression. If the new pooled prevalence lies outside of the 95%  
234 CI of the original pooled prevalence, we will conclude that the excluded study has a significant  
235 effect on the pooled estimate and should be excluded from the final analysis (38,39). Some  
236 other issues may also be identified for sensitivity analysis during the systematic review  
237 process.

## 238 *Analysis of subgroups or subsets*

239 To reduce the random variations between the estimates of primary studies, we will perform  
240 subgroup analysis wherever feasible according to study setting, geographical region (states),  
241 states by GDP per capita, type of diagnostic instrument, dementia screening, sampling design,  
242 and study period.

## 243 **Patient and Public Involvement**

244 No patients are directly involved in this study. The data for systematic review will be  
245 collected from previously published studies.

## 246 **Discussion**

247 Screening tools are simple to administer, take less time, and are highly useful in primary care  
248 settings to screen the people for depression (40). However, confirming a diagnosis of



1  
2  
3  
4 249 depression by a diagnostic tool provides a more accurate picture of the magnitude of  
5  
6 250 depression. Based on earlier literature, the estimated prevalence of depression was  
7  
8 251 significantly higher when self-reporting instruments or screening tools were used to assess  
9  
10 252 depression (25,41). The estimation based on screening tools varied widely with the type of  
11  
12 253 study tools, geographic region, sample size, sampling methods, and prevalent socio-cultural  
13  
14 254 differences in the country. These may be responsible for different levels of mental health  
15  
16 255 disorders in India. Hence, we will address this issue by using different meta-analytic techniques  
17  
18 256 such as subgroup and sensitivity analyses such as jackknife estimation, meta-regression, and  
19  
20 257 cumulative meta-analyses.

21  
22 259 In India, the National Mental Health Survey (NMHS) reported a lower prevalence of lifetime  
23  
24 260 depression (3.14%) and during the previous 12-month period (1.7%) (42) compared to pooled  
25  
26 261 data from 18 countries (n= 89,037) which estimated the average lifetime and 12-month  
27  
28 262 prevalence estimates of DSM-IV MDE to be 14.6% and 5.5% in 10 high-income countries, and  
29  
30 263 11.1% and 5.9% in 8 low- to middle-income countries, respectively (43). This study will  
31  
32 264 provide the unique opportunity to compare the magnitude of depression estimated using  
33  
34 265 screening tools and findings of NHMS with the pooled estimate of various research studies that  
35  
36 266 have used diagnostic instruments for the identification of depression among elderly persons in  
37  
38 267 India.

39 269 In India, mental health services receive a minor fraction of the overall health budget, which is  
40  
41 270 grossly inadequate in proportion to the rising burden of mental disorders. Also, there is a lack  
42  
43 271 of robust and reliable data to address the need for community based mental health services  
44  
45 272 planning and management. The findings of this study, i.e., the estimated magnitude of  
46  
47 273 depression among elderly persons using diagnostic instruments, distribution among subgroups,  
48  
49 274 and regions will help to plan and manage geriatric mental health program in a better way and  
50  
51 275 will provide further directions to future research in the depression epidemiology and its burden  
52  
53 276 in the elderly population. It will also strengthen the provision of comprehensive mental health  
54  
55 277 services in primary health care settings, especially, among the geriatric population in India.

56  
57  
58  
59  
60 278

279 **Ethics and dissemination:** Ethical approval is not required as it will be a systematic review.  
280 Data from previously published studies will be retrieved and analyzed. Findings will be  
281 disseminated through a peer-reviewed publication in a scientific journal and conferences.

## 282 **Abbreviations**

283  
284 GDP – Gross Domestic Product

## 285 **Supplementary data**

286 Not applicable.

## 287 **Availability of data and materials**

288 Will be available once collected.

## 289 **Author Contributions**

290 Conceived the idea: PMB, MB, VY, MP, and SDG. Designed the protocol and wrote the  
291 paper: MB, VY, MP, PMB, DD, SMB, VM, SDG, and SP. Critical revision to the  
292 manuscript: MB, VY, MP, PMB, DD, SP, VM, and SDG. All authors have read and  
293 approved the manuscript. PMB and MB are the guarantors of the paper.

294 **Conflicts of Interest:** None declared.

295 **Funding:** This research received no specific grant from any funding agency in public,  
296 commercial, or not-for-profit sectors.

297 **Data sharing statement:** No additional data are available.

## 298 **Acknowledgments**

299 None.

## 300 **References**

- 301 1. Sivertsen H, Bjørkløf GH, Engedal K, Selbæk G, Helvik AS. Depression and quality of life in  
302 older persons: A review [Internet]. Vol. 40, Dementia and Geriatric Cognitive Disorders. S.  
303 Karger AG; 2015 [cited 2020 Mar 3]. p. 311–39. Available from:  
304 <http://www.ncbi.nlm.nih.gov/pubmed/26360014>
- 305 2. Monroe SM, Harkness KL. Is depression a chronic mental illness? Psychol Med [Internet].  
306 2012 May [cited 2020 Mar 3];42(5):899–902. Available from:  
307 <http://www.ncbi.nlm.nih.gov/pubmed/21995936>

- 1  
2  
3  
4 308 3. Berlim MT, Fleck MPA. Quality of life and major depression. In: Quality of Life Impairment in  
5 309 Schizophrenia, Mood and Anxiety Disorders: New Perspectives on Research and Treatment.  
6 310 Springer Netherlands; 2007. p. 241–52.
- 8 311 4. World Health Organization. Depression and other common mental disorders. Global health  
9 312 estimates [Internet]. World Health Organization. Geneva; 2017. Available from:  
10 313 <https://apps.who.int/iris/bitstream/handle/10665/254610/WHO-MSD-MER-2017.2-eng.pdf>
- 13 314 5. Pilia M, Bairwa M, Kumar N, Khanna P, Kurana H. Elderly depression in India: An emerging  
14 315 public health challenge. Vol. 6, Australasian Medical Journal. Australasian Medical Journal;  
15 316 2013. p. 107–11.
- 17 317 6. World Health Organization. Mental health of older adults [Internet]. World Health  
18 318 Organization. [cited 2020 Mar 3]. Available from: [https://www.who.int/news-room/fact-](https://www.who.int/news-room/fact-sheets/detail/mental-health-of-older-adults)  
19 319 [sheets/detail/mental-health-of-older-adults](https://www.who.int/news-room/fact-sheets/detail/mental-health-of-older-adults)
- 21 320 7. Lépine JP, Briley M. The increasing burden of depression. *Neuropsychiatr Dis Treat*. 2011 May  
22 321 31;7(SUPPL.):3–7.
- 24 322 8. Murray CJL, Lopez AD. Alternative projections of mortality and disability by cause 1990-2020:  
25 323 Global Burden of Disease Study. *Lancet*. 1997 May 24;349(9064):1498–504.
- 27 324 9. Amudhan S, Gururaj G, Varghese M, Benegal V, Rao GN, Sheehan DV, et al. A population-  
28 325 based analysis of suicidality and its correlates: findings from the National Mental Health  
29 326 Survey of India, 2015–16. *The Lancet Psychiatry*. 2020 Jan 1;7(1):41–51.
- 31 327 10. Agarwal A, Lubet A, Mitgang E, Mohanty S, Bloom DE. Population aging in India: Facts, issues,  
32 328 and options. Boston, Massachusetts; 2016. (PGDA Working Paper). Report No.: 132.
- 34 329 11. Office of the Registrar General & Census Commissioner I. Census of India Website [Internet].  
35 330 [cited 2020 Mar 3]. Available from: <https://censusindia.gov.in/>
- 37 331 12. Government of India. National Policy for Senior Citizens National Policy on Senior Citizens  
38 332 2011 [Internet]. New Delhi; 2011. Available from:  
39 333 <http://socialjustice.nic.in/writereaddata/UploadFile/dnpsc.pdf>
- 42 334 13. Government of India. National Programme for Health Care of the Elderly (NPHCE) [Internet].  
43 335 Ministry of Health & Familily Welfare, Govt of India. [cited 2020 Mar 2]. Available from:  
44 336 [https://mohfw.gov.in/major-programmes/other-national-health-programmes/national-](https://mohfw.gov.in/major-programmes/other-national-health-programmes/national-programme-health-care-elderlynphce)  
45 337 [programme-health-care-elderlynphce](https://mohfw.gov.in/major-programmes/other-national-health-programmes/national-programme-health-care-elderlynphce)
- 47 338 14. Grover S, Dalla E, Mehra A, Chakrabarti S, Avasthi A. Physical comorbidity and its impact on  
48 339 symptom profile of depression among elderly patients attending psychiatry services of a  
49 340 Tertiary Care Hospital. *Indian J Psychol Med*. 2017 Jul 1;39(4):450–6.
- 51 341 15. Behera P, Sharan P, Mishra AK, Nongkynrih B, Kant S, Gupta SK. Prevalence and determinants  
52 342 of depression among elderly persons in a rural community from northern India. *Natl Med J*  
53 343 *India*. 2016 May 1;29(3):129–35.
- 55 344 16. Pilia M, Yadav V, Bairwa M, Behera P, Gupta SD, Khurana H, et al. Prevalence of depression  
56 345 among the elderly (60 years and above) population in India, 1997-2016: A systematic review  
57 346 and meta-analysis. *BMC Public Health*. 2019.

- 1  
2  
3  
4 347 17. Maxim LD, Niebo R, Utell MJ. Screening tests: A review with examples [Internet]. Vol. 26,  
5 348 Inhalation Toxicology. Informa Healthcare; 2014 [cited 2020 Mar 3]. p. 811–28. Available  
6 349 from: <http://www.ncbi.nlm.nih.gov/pubmed/25264934>
- 8 350 18. Thombs BD, Kwakkenbos L, Levis AW, Benedetti A. Addressing overestimation of the  
9 351 prevalence of depression based on self-report screening questionnaires. CMAJ [Internet].  
10 352 2018 Jan 15 [cited 2020 Mar 3];190(2):E44–9. Available from:  
11 353 <http://www.ncbi.nlm.nih.gov/pubmed/29335262>
- 13 354 19. Levis B, Yan XW, He C, Sun Y, Benedetti A, Thombs BD. Comparison of depression prevalence  
14 355 estimates in meta-analyses based on screening tools and rating scales versus diagnostic  
15 356 interviews: A meta-research review. BMC Med [Internet]. 2019 Mar 21 [cited 2020 Mar  
16 357 3];17(1):65. Available from:  
17 358 <https://bmcmmedicine.biomedcentral.com/articles/10.1186/s12916-019-1297-6>
- 19 359 20. Lim GY, Tam WW, Lu Y, Ho CS, Zhang MW, Ho RC. Prevalence of Depression in the  
20 360 Community from 30 Countries between 1994 and 2014 /692/699/476/1414 /692/499 article.  
21 361 Sci Rep [Internet]. 2018;8(1):1–10. Available from: [http://dx.doi.org/10.1038/s41598-018-](http://dx.doi.org/10.1038/s41598-018-21243-x)  
22 362 [21243-x](http://dx.doi.org/10.1038/s41598-018-21243-x)
- 24 363 21. Boyle MH. Guidelines for evaluating prevalence studies. Evid Based Ment Health.  
25 364 1998;1(2):37–9.
- 27 365 22. Cheung MWL, Ho RCM, Lim Y, Mak A. Conducting a meta-analysis: Basics and good practices.  
28 366 Int J Rheum Dis [Internet]. 2012 Apr [cited 2020 Mar 3];15(2):129–35. Available from:  
29 367 <http://www.ncbi.nlm.nih.gov/pubmed/22462415>
- 31 368 23. Davison TE, McCabe MP, Mellor D. An examination of the gold standard diagnosis of major  
32 369 depression in aged-care settings. Am J Geriatr Psychiatry [Internet]. 2009 May [cited 2020  
33 370 Mar 3];17(5):359–67. Available from: <http://www.ncbi.nlm.nih.gov/pubmed/19390293>
- 35 371 24. Moher D, Shamseer L, Clarke M, Ghersi D, Liberati A, Petticrew M, et al. Preferred reporting  
36 372 items for systematic review and meta-analysis protocols (PRISMA-P) 2015 statement. Rev Esp  
37 373 Nutr Humana y Diet. 2016;20(2):148–60.
- 39 374 25. Behera P, Pilania M, Yadav V, Bairwa M, Dabar D, Behera SM. Estimation of prevalence of  
40 375 depression in elderly population using diagnostic methods in India: a systematic review and  
41 376 meta-analysis [Internet]. 2019 [cited 2020 Mar 3]. Available from:  
42 377 [https://www.crd.york.ac.uk/prospero/display\\_record.php?ID=CRD42019138453](https://www.crd.york.ac.uk/prospero/display_record.php?ID=CRD42019138453)
- 44 378 26. Saito M, Iwata N, Kawakami N, Matsuyama Y, Ono Y, Nakane Y, et al. Evaluation of the DSM-  
45 379 IV and ICD-10 criteria for depressive disorders in a community population in Japan using item  
46 380 response theory. Int J Methods Psychiatr Res. 2010 Dec;19(4):211–22.
- 48 381 27. Ouzzani M, Hammady H, Fedorowicz Z, Elmagarmid A. Rayyan-a web and mobile app for  
49 382 systematic reviews. Syst Rev. 2016 Dec 5;5(1).
- 51 383 28. Download Mendeley Desktop Software [Internet]. [cited 2020 Mar 3]. Available from:  
52 384 <https://www.mendeley.com/download-desktop/>
- 54 385 29. Downes MJ, Brennan ML, Williams HC, Dean RS. Development of a critical appraisal tool to  
55 386 assess the quality of cross-sectional studies (AXIS). BMJ Open. 2016 Dec 1;6(12):e011458.
- 57  
58  
59  
60

- 1  
2  
3  
4 387 30. Higgins J, Green S, editors. Meta-regression. In: Cochrane Handbook for Systematic Reviews  
5 388 of Interventions Version 510 [updated March 2011] [Internet]. Version 5. London: The  
6 389 Cochrane Collaboration; 2011. Available from: [https://handbook-5-](https://handbook-5-1.cochrane.org/chapter_9/9_6_4_meta_regression.htm)  
7 390 [1.cochrane.org/chapter\\_9/9\\_6\\_4\\_meta\\_regression.htm](https://handbook-5-1.cochrane.org/chapter_9/9_6_4_meta_regression.htm)  
8  
9  
10 391 31. Leimu R, Koricheva J. Cumulative meta-analysis: A new tool for detection of temporal trends  
11 392 and publication bias in ecology. *Proc R Soc B Biol Sci* [Internet]. 2004 Sep 22 [cited 2020 Mar  
12 393 3];271(1551):1961–6. Available from: <http://www.ncbi.nlm.nih.gov/pubmed/15347521>  
13  
14 394 32. Mindstretcher 1 - quality and size. Bandolier [Internet]. 2002 [cited 2020 Mar 3];9(3):3.  
15 395 Available from: <http://www.bandolier.org.uk/band97/b97-3.html#Heading7>  
16  
17 396 33. StataCorp. Stata Statistical Software. College Station, TX: StataCorp LLC; 2017.  
18  
19 397 34. Schwarzer G. Meta: An R package for meta-analysis. *R News*. 2007;7(3):40–5.  
20  
21 398 35. Viechtbauer W. Conducting Meta-Analyses in R with the metafor Package. *J Stat Softw*.  
22 399 2010;36(3):1–48.  
23  
24 400 36. Barendregt JJ, Doi SA, Lee YY, Norman RE, Vos T. Meta-analysis of prevalence. *J Epidemiol*  
25 401 *Community Health*. 2013 Nov 1;67(11):974–8.  
26  
27 402 37. Higgins J, Green S, editors. Sensitivity analyses. In: Cochrane Handbook for Systematic  
28 403 Reviews of Interventions Version 510 [updated March 2011] [Internet]. London: The  
29 404 Cochrane Collaboration; 2011. Available from: [https://handbook-5-](https://handbook-5-1.cochrane.org/chapter_9/9_7_sensitivity_analyses.htm)  
30 405 [1.cochrane.org/chapter\\_9/9\\_7\\_sensitivity\\_analyses.htm](https://handbook-5-1.cochrane.org/chapter_9/9_7_sensitivity_analyses.htm)  
31  
32 406 38. Viechtbauer W, Cheung MW-L. Outlier and influence diagnostics for meta-analysis. *Res Synth*  
33 407 *Methods* [Internet]. 2010 Apr [cited 2020 Mar 3];1(2):112–25. Available from:  
34 408 <http://www.ncbi.nlm.nih.gov/pubmed/26061377>  
35  
36 409 39. Len I, Seaman C. The Trusty Jackknife. Method identifies outliers and bias in statistical  
37 410 estimates. *Quality Progress*. [Internet]. The Official Publication of ASQ. [cited 2019 Sep 7].  
38 411 Available from: [http://asq.org/quality-progress/2008/07/statistics-roundtable/statistics-](http://asq.org/quality-progress/2008/07/statistics-roundtable/statistics-roundtable-the-trusty-jackknife.html)  
39 412 [roundtable-the-trusty-jackknife.html](http://asq.org/quality-progress/2008/07/statistics-roundtable/statistics-roundtable-the-trusty-jackknife.html)  
40  
41 413 40. Behera P, Gupta SK, Nongkynrih B, Kant S, Mishra AK, Sharan P. Screening instruments for  
42 414 assessment of depression. *Indian J Med Spec* [Internet]. 2017;8(1):31–7. Available from:  
43 415 <http://dx.doi.org/10.1016/j.injms.2016.11.003>  
44  
45 416 41. Lim GY, Tam WW, Lu Y, Ho CS, Zhang MW, Ho RC. Prevalence of Depression in the  
46 417 Community from 30 Countries between 1994 and 2014 /692/699/476/1414 /692/499 article.  
47 418 *Sci Rep*. 2018 Dec 1;8(1).  
48  
49 419 42. National Mental Health Survey 2015-16 – Nimhans [Internet]. [cited 2020 Mar 3]. Available  
50 420 from: <http://nimhans.ac.in/national-mental-health-survey-2015-16/>  
51  
52 421 43. Bromet E, Andrade LH, Hwang I, Sampson NA, Alonso J, de Girolamo G, et al. Cross-national  
53 422 epidemiology of DSM-IV major depressive episode. *BMC Med* [Internet]. 2011;9. Available  
54 423 from:  
55 424 <http://www.embase.com/search/results?subaction=viewrecord&from=export&id=L5154596>  
56 425  
57  
58  
59  
60

426

For peer review only

1  
2  
3  
4  
5  
6  
7  
8  
9  
10  
11  
12  
13  
14  
15  
16  
17  
18  
19  
20  
21  
22  
23  
24  
25  
26  
27  
28  
29  
30  
31  
32  
33  
34  
35  
36  
37  
38  
39  
40  
41  
42  
43  
44  
45  
46  
47  
48  
49  
50  
51  
52  
53  
54  
55  
56  
57  
58  
59  
60

## Appendix 1

# Reporting checklist for protocol of a systematic review.

Based on the PRISMA-P guidelines.

## Instructions to authors

Complete this checklist by entering the page numbers from your manuscript where readers will find each of the items listed below.

Your article may not currently address all the items on the checklist. Please modify your text to include the missing information. If you are certain that an item does not apply, please write "n/a" and provide a short explanation.

Upload your completed checklist as an extra file when you submit to a journal.

In your methods section, say that you used the PRISMA-Preorting guidelines, and cite them as:

Moher D, Shamseer L, Clarke M, Ghersi D, Liberati A, Petticrew M, Shekelle P, Stewart LA. Preferred Reporting Items for Systematic Review and Meta-Analysis Protocols (PRISMA-P) 2015 statement. Syst Rev. 2015;4(1):1.

|                     | Reporting Item                                                                                                                                                | Page Number |
|---------------------|---------------------------------------------------------------------------------------------------------------------------------------------------------------|-------------|
| <b>Title</b>        |                                                                                                                                                               |             |
| Identification      | <a href="#">#1a</a> Identify the report as a protocol of a systematic review                                                                                  | 1,3         |
| Update              | <a href="#">#1b</a> If the protocol is for an update of a previous systematic review, identify as such                                                        | N/A         |
| <b>Registration</b> |                                                                                                                                                               |             |
|                     | <a href="#">#2</a> If registered, provide the name of the registry (such as PROSPERO) and registration number                                                 | 2,4         |
| <b>Authors</b>      |                                                                                                                                                               |             |
| Contact             | <a href="#">#3a</a> Provide name, institutional affiliation, e-mail address of all protocol authors; provide physical mailing address of corresponding author | 1           |



|    |                           |                     |                                                                                                                                                                                                                               |                                                              |
|----|---------------------------|---------------------|-------------------------------------------------------------------------------------------------------------------------------------------------------------------------------------------------------------------------------|--------------------------------------------------------------|
| 1  | Contribution              | <a href="#">#3b</a> | Describe contributions of protocol authors and identify the guarantor of the review                                                                                                                                           | 9                                                            |
| 2  |                           |                     |                                                                                                                                                                                                                               |                                                              |
| 3  |                           |                     |                                                                                                                                                                                                                               |                                                              |
| 4  | <b>Amendments</b>         |                     |                                                                                                                                                                                                                               |                                                              |
| 5  |                           |                     |                                                                                                                                                                                                                               |                                                              |
| 6  |                           |                     |                                                                                                                                                                                                                               |                                                              |
| 7  |                           | <a href="#">#4</a>  | If the protocol represents an amendment of a previously completed or published protocol, identify as such and list changes; otherwise, state plan for documenting important protocol amendments                               | N/A; not a significant amendment is planned in the protocol. |
| 8  |                           |                     |                                                                                                                                                                                                                               |                                                              |
| 9  |                           |                     |                                                                                                                                                                                                                               |                                                              |
| 10 |                           |                     |                                                                                                                                                                                                                               |                                                              |
| 11 |                           |                     |                                                                                                                                                                                                                               |                                                              |
| 12 |                           |                     |                                                                                                                                                                                                                               |                                                              |
| 13 |                           |                     |                                                                                                                                                                                                                               |                                                              |
| 14 | <b>Support</b>            |                     |                                                                                                                                                                                                                               |                                                              |
| 15 |                           |                     |                                                                                                                                                                                                                               |                                                              |
| 16 |                           |                     |                                                                                                                                                                                                                               |                                                              |
| 17 | Sources                   | <a href="#">#5a</a> | Indicate sources of financial or other support for the review                                                                                                                                                                 | 9                                                            |
| 18 |                           |                     |                                                                                                                                                                                                                               |                                                              |
| 19 |                           |                     |                                                                                                                                                                                                                               |                                                              |
| 20 | Sponsor                   | <a href="#">#5b</a> | Provide name for the review funder and / or sponsor                                                                                                                                                                           | N/A                                                          |
| 21 |                           |                     |                                                                                                                                                                                                                               |                                                              |
| 22 |                           |                     |                                                                                                                                                                                                                               |                                                              |
| 23 |                           |                     |                                                                                                                                                                                                                               |                                                              |
| 24 | Role of sponsor or funder | <a href="#">#5c</a> | Describe roles of funder(s), sponsor(s), and / or institution(s), if any, in developing the protocol                                                                                                                          | N/A                                                          |
| 25 |                           |                     |                                                                                                                                                                                                                               |                                                              |
| 26 |                           |                     |                                                                                                                                                                                                                               |                                                              |
| 27 |                           |                     |                                                                                                                                                                                                                               |                                                              |
| 28 |                           |                     |                                                                                                                                                                                                                               |                                                              |
| 29 | <b>Introduction</b>       |                     |                                                                                                                                                                                                                               |                                                              |
| 30 |                           |                     |                                                                                                                                                                                                                               |                                                              |
| 31 | Rationale                 | <a href="#">#6</a>  | Describe the rationale for the review in the context of what is already known                                                                                                                                                 | 3                                                            |
| 32 |                           |                     |                                                                                                                                                                                                                               |                                                              |
| 33 |                           |                     |                                                                                                                                                                                                                               |                                                              |
| 34 | Objectives                | <a href="#">#7</a>  | Provide an explicit statement of the question(s) the review will address with reference to participants, interventions, comparators, and outcomes (PICO)                                                                      | 4                                                            |
| 35 |                           |                     |                                                                                                                                                                                                                               |                                                              |
| 36 |                           |                     |                                                                                                                                                                                                                               |                                                              |
| 37 |                           |                     |                                                                                                                                                                                                                               |                                                              |
| 38 |                           |                     |                                                                                                                                                                                                                               |                                                              |
| 39 |                           |                     |                                                                                                                                                                                                                               |                                                              |
| 40 |                           |                     |                                                                                                                                                                                                                               |                                                              |
| 41 | <b>Methods</b>            |                     |                                                                                                                                                                                                                               |                                                              |
| 42 |                           |                     |                                                                                                                                                                                                                               |                                                              |
| 43 | Eligibility criteria      | <a href="#">#8</a>  | Specify the study characteristics (such as PICO, study design, setting, time frame) and report characteristics (such as years considered, language, publication status) to be used as criteria for eligibility for the review | 4                                                            |
| 44 |                           |                     |                                                                                                                                                                                                                               |                                                              |
| 45 |                           |                     |                                                                                                                                                                                                                               |                                                              |
| 46 |                           |                     |                                                                                                                                                                                                                               |                                                              |
| 47 |                           |                     |                                                                                                                                                                                                                               |                                                              |
| 48 |                           |                     |                                                                                                                                                                                                                               |                                                              |
| 49 |                           |                     |                                                                                                                                                                                                                               |                                                              |
| 50 |                           |                     |                                                                                                                                                                                                                               |                                                              |
| 51 |                           |                     |                                                                                                                                                                                                                               |                                                              |
| 52 | Information sources       | <a href="#">#9</a>  | Describe all intended information sources (such as electronic databases, contact with study authors, trial registers or other grey literature sources) with planned dates of coverage                                         | 4                                                            |
| 53 |                           |                     |                                                                                                                                                                                                                               |                                                              |
| 54 |                           |                     |                                                                                                                                                                                                                               |                                                              |
| 55 |                           |                     |                                                                                                                                                                                                                               |                                                              |
| 56 |                           |                     |                                                                                                                                                                                                                               |                                                              |
| 57 |                           |                     |                                                                                                                                                                                                                               |                                                              |
| 58 |                           |                     |                                                                                                                                                                                                                               |                                                              |
| 59 |                           |                     |                                                                                                                                                                                                                               |                                                              |
| 60 |                           |                     |                                                                                                                                                                                                                               |                                                              |



|    |                    |                      |                                                          |     |
|----|--------------------|----------------------|----------------------------------------------------------|-----|
| 1  | Search strategy    | <a href="#">#10</a>  | Present draft of search strategy to be used              | 4-5 |
| 2  |                    |                      | for at least one electronic database,                    |     |
| 3  |                    |                      | including planned limits, such that it could be          |     |
| 4  |                    |                      | repeated                                                 |     |
| 5  |                    |                      |                                                          |     |
| 6  |                    |                      |                                                          |     |
| 7  | Study records -    | <a href="#">#11a</a> | Describe the mechanism(s) that will be used              | 5   |
| 8  | data               |                      | to manage records and data throughout the                |     |
| 9  | management         |                      | review                                                   |     |
| 10 |                    |                      |                                                          |     |
| 11 |                    |                      |                                                          |     |
| 12 | Study records -    | <a href="#">#11b</a> | State the process that will be used for                  | 5-6 |
| 13 | selection process  |                      | selecting studies (such as two independent               |     |
| 14 |                    |                      | reviewers) through each phase of the review              |     |
| 15 |                    |                      | (that is, screening, eligibility and inclusion in        |     |
| 16 |                    |                      | meta-analysis)                                           |     |
| 17 |                    |                      |                                                          |     |
| 18 |                    |                      |                                                          |     |
| 19 |                    |                      |                                                          |     |
| 20 | Study records -    | <a href="#">#11c</a> | Describe planned method of extracting data               | 6   |
| 21 | data collection    |                      | from reports (such as piloting forms, done               |     |
| 22 | process            |                      | independently, in duplicate), any processes              |     |
| 23 |                    |                      | for obtaining and confirming data from                   |     |
| 24 |                    |                      | investigators                                            |     |
| 25 |                    |                      |                                                          |     |
| 26 |                    |                      |                                                          |     |
| 27 | Data items         | <a href="#">#12</a>  | List and define all variables for which data             | 6   |
| 28 |                    |                      | will be sought (such as PICO items, funding              |     |
| 29 |                    |                      | sources), any pre-planned data assumptions               |     |
| 30 |                    |                      | and simplifications                                      |     |
| 31 |                    |                      |                                                          |     |
| 32 |                    |                      |                                                          |     |
| 33 |                    |                      |                                                          |     |
| 34 | Outcomes and       | <a href="#">#13</a>  | List and define all outcomes for which data              | 6   |
| 35 | prioritization     |                      | will be sought, including prioritization of main         |     |
| 36 |                    |                      | and additional outcomes, with rationale                  |     |
| 37 |                    |                      |                                                          |     |
| 38 |                    |                      |                                                          |     |
| 39 | Risk of bias in    | <a href="#">#14</a>  | Describe anticipated methods for assessing               | 6   |
| 40 | individual studies |                      | risk of bias of individual studies, including            |     |
| 41 |                    |                      | whether this will be done at the outcome or              |     |
| 42 |                    |                      | study level, or both; state how this                     |     |
| 43 |                    |                      | information will be used in data synthesis               |     |
| 44 |                    |                      |                                                          |     |
| 45 |                    |                      |                                                          |     |
| 46 | Data synthesis     | <a href="#">#15a</a> | Describe criteria under which study data will            | 6-8 |
| 47 |                    |                      | be quantitatively synthesised                            |     |
| 48 |                    |                      |                                                          |     |
| 49 |                    |                      |                                                          |     |
| 50 | Data synthesis     | <a href="#">#15b</a> | If data are appropriate for quantitative                 | 7-8 |
| 51 |                    |                      | synthesis, describe planned summary                      |     |
| 52 |                    |                      | measures, methods of handling data and                   |     |
| 53 |                    |                      | methods of combining data from studies,                  |     |
| 54 |                    |                      | including any planned exploration of                     |     |
| 55 |                    |                      | consistency (such as I <sup>2</sup> , Kendall's $\tau$ ) |     |
| 56 |                    |                      |                                                          |     |
| 57 |                    |                      |                                                          |     |
| 58 |                    |                      |                                                          |     |
| 59 |                    |                      |                                                          |     |
| 60 |                    |                      |                                                          |     |

|    |                |                      |                                                                                                                               |                                                                                                                                                                                    |
|----|----------------|----------------------|-------------------------------------------------------------------------------------------------------------------------------|------------------------------------------------------------------------------------------------------------------------------------------------------------------------------------|
| 1  | Data synthesis | <a href="#">#15c</a> | Describe any proposed additional analyses (such as sensitivity or subgroup analyses, meta-regression)                         | 7-8                                                                                                                                                                                |
| 2  |                |                      |                                                                                                                               |                                                                                                                                                                                    |
| 3  |                |                      |                                                                                                                               |                                                                                                                                                                                    |
| 4  |                |                      |                                                                                                                               |                                                                                                                                                                                    |
| 5  |                |                      |                                                                                                                               |                                                                                                                                                                                    |
| 6  | Data synthesis | <a href="#">#15d</a> | If quantitative synthesis is not appropriate, describe the type of summary planned                                            | 6                                                                                                                                                                                  |
| 7  |                |                      |                                                                                                                               |                                                                                                                                                                                    |
| 8  |                |                      |                                                                                                                               |                                                                                                                                                                                    |
| 9  | Meta-bias(es)  | <a href="#">#16</a>  | Specify any planned assessment of meta-bias(es) (such as publication bias across studies, selective reporting within studies) | 7                                                                                                                                                                                  |
| 10 |                |                      |                                                                                                                               |                                                                                                                                                                                    |
| 11 |                |                      |                                                                                                                               |                                                                                                                                                                                    |
| 12 |                |                      |                                                                                                                               |                                                                                                                                                                                    |
| 13 |                |                      |                                                                                                                               |                                                                                                                                                                                    |
| 14 | Confidence in  | <a href="#">#17</a>  | Describe how the strength of the body of evidence will be assessed (such as GRADE)                                            | N/A; almost all studies will be cross-sectional studies, hence, the use of GRADE is not required, however, heterogeneity will be assessed using subgroup and sensitivity analyses. |
| 15 | cumulative     |                      |                                                                                                                               |                                                                                                                                                                                    |
| 16 | evidence       |                      |                                                                                                                               |                                                                                                                                                                                    |
| 17 |                |                      |                                                                                                                               |                                                                                                                                                                                    |
| 18 |                |                      |                                                                                                                               |                                                                                                                                                                                    |
| 19 |                |                      |                                                                                                                               |                                                                                                                                                                                    |
| 20 |                |                      |                                                                                                                               |                                                                                                                                                                                    |
| 21 |                |                      |                                                                                                                               |                                                                                                                                                                                    |
| 22 |                |                      |                                                                                                                               |                                                                                                                                                                                    |
| 23 | Notes:         |                      |                                                                                                                               |                                                                                                                                                                                    |

## Notes:

- 4: N/A; not a significant amendment is planned in the protocol.
- 17: N/A; almost all studies will be cross-sectional studies, hence, the use GRADE is not required, however, heterogeneity will be assessed using subgroup and sensitivity analyses.
- The PRISMA-P checklist is distributed under the terms of the Creative Commons Attribution License CC-BY 4.0. This checklist was completed on 15. September 2019 using <https://www.goodreports.org/>, a tool made by the [EQUATOR Network](#) in collaboration with [Penelope.ai](#)
